# Supplementary material for: 1,1′-Bi(2-naphthol-4,5-dicarboximide)s: blue emissive axially chiral scaffolds with aggregation-enhanced emission properties
Source: Royal Society of Chemistry journal article supplement (doi:10.1039/c9qo01090d), 2019-01-01
Supplement: c9qo01090d1.pdf [file c9qo01090d1.pdf]

Electronic Supplementary Information for

**1,1'-Bi(2-naphthol-4,5-dicarboximide)s: Blue Emissive Axially Chiral Scaffolds with  
Aggregation-enhanced Emission Properties**

Meng-Ting Chen,<sup>a</sup> Yang Zhang,<sup>a</sup> Myroslav O. Vysotsky,<sup>b</sup> Joachim O. Lindner,<sup>b</sup>

Meng-Hua Li,<sup>a</sup> Mei-Jin Lin,<sup>a\*</sup> and Frank Würthner <sup>b\*</sup>

<sup>a</sup>State Key Laboratory of Photocatalysis on Energy and Environment, College of Chemistry, Fuzhou University, 350116 Fuzhou, China. E-mail: meijin\_lin@fzu.edu.cn

<sup>b</sup>Institut für Organische Chemie & Center for Nanosystems Chemistry, Universität Würzburg, Am Hubland, 97074 Würzburg, Germany. E-mail: wuerthner@uni-wuerzburg.de

**Table of Contents:**

|                                                                                                    |     |
|----------------------------------------------------------------------------------------------------|-----|
| 1. Nuclear magnetic resonance (NMR) spectra                                                        | S2  |
| 2. High-resolution mass spectra (HRMS)                                                             | S16 |
| 3. Single-crystal X-ray diffraction analyses                                                       | S23 |
| 3.1 Methods and crystal data                                                                       | S23 |
| 3.2 The molecular structure of <b>4b</b>                                                           | S24 |
| 4. Chiral HPLC analyses of <b>6a</b> , <b>6b</b> , <b>1a</b> , <b>1b</b> , ( <b>R</b> )- <b>1a</b> | S25 |
| 5. Absorption, fluorescence and circular dichroism spectral measurements                           | S29 |
| 6. Cyclic voltammetry measurements                                                                 | S34 |
| 7. Theoretical calculations                                                                        | S36 |
| 8. Methanol-water system luminescence measurements                                                 | S38 |
| 9. Luminescence lifetime measurements                                                              | S39 |
| 10. References                                                                                     | S43 |

## 1. Nuclear magnetic resonance (NMR) spectra

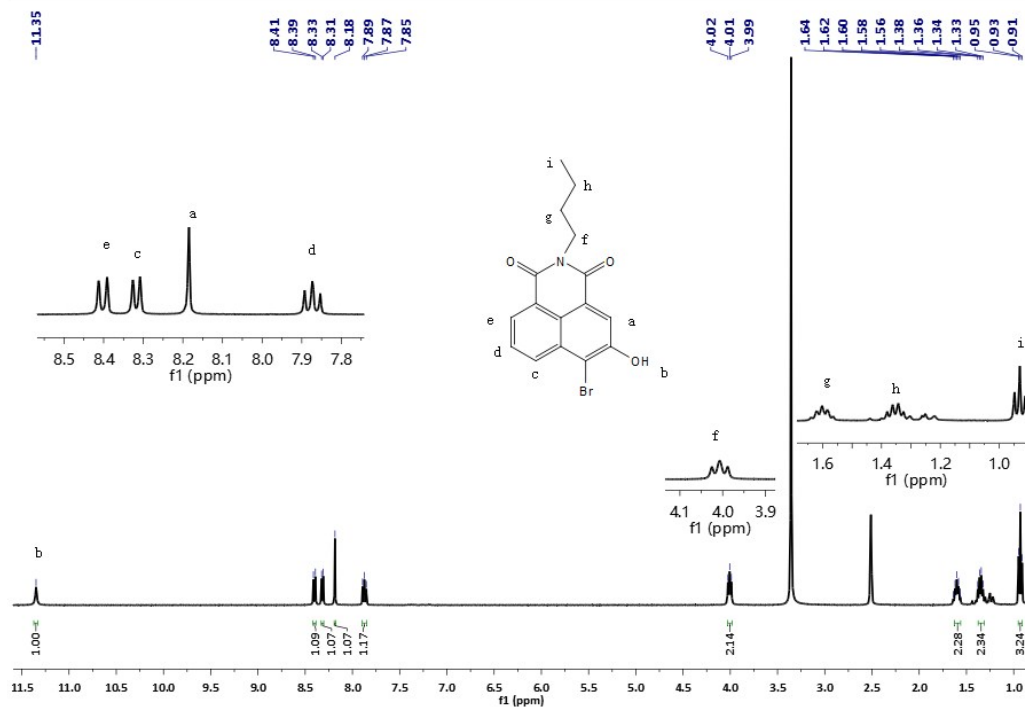

Figure S1. <sup>1</sup>H NMR spectrum of **3a** (400 MHz, d<sub>6</sub>-DMSO, 298K)

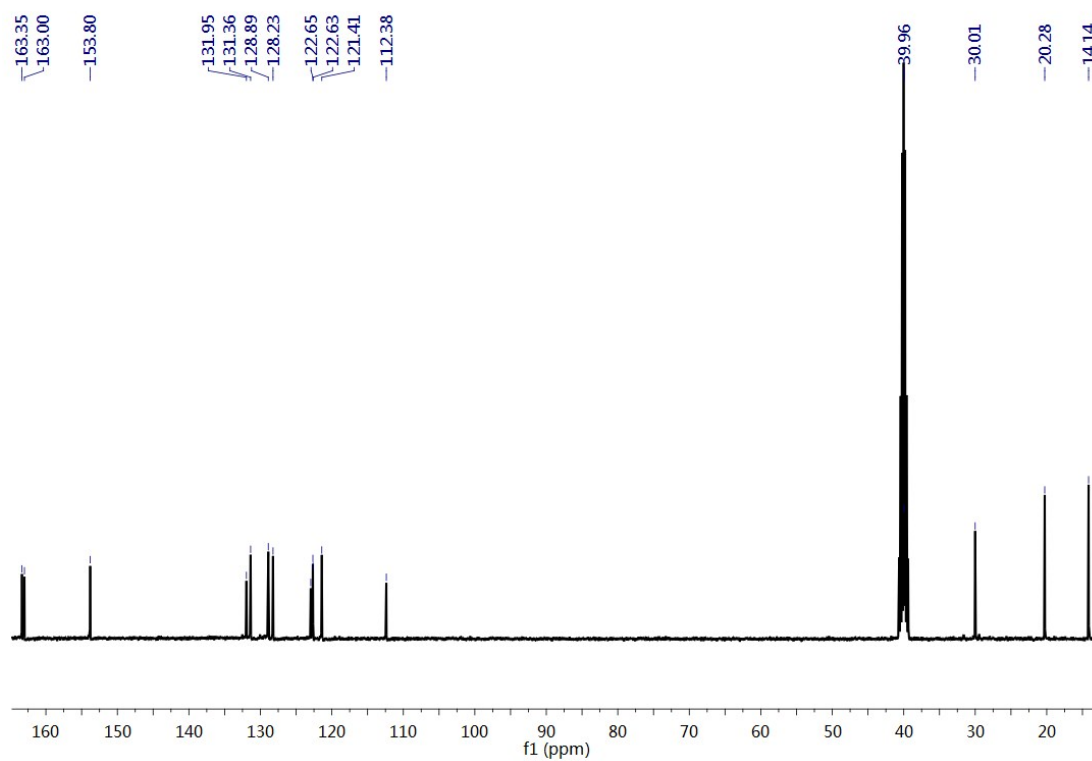

Figure S2. <sup>13</sup>C NMR spectrum of **3a** (100 MHz, d<sub>6</sub>-DMSO, 298K)

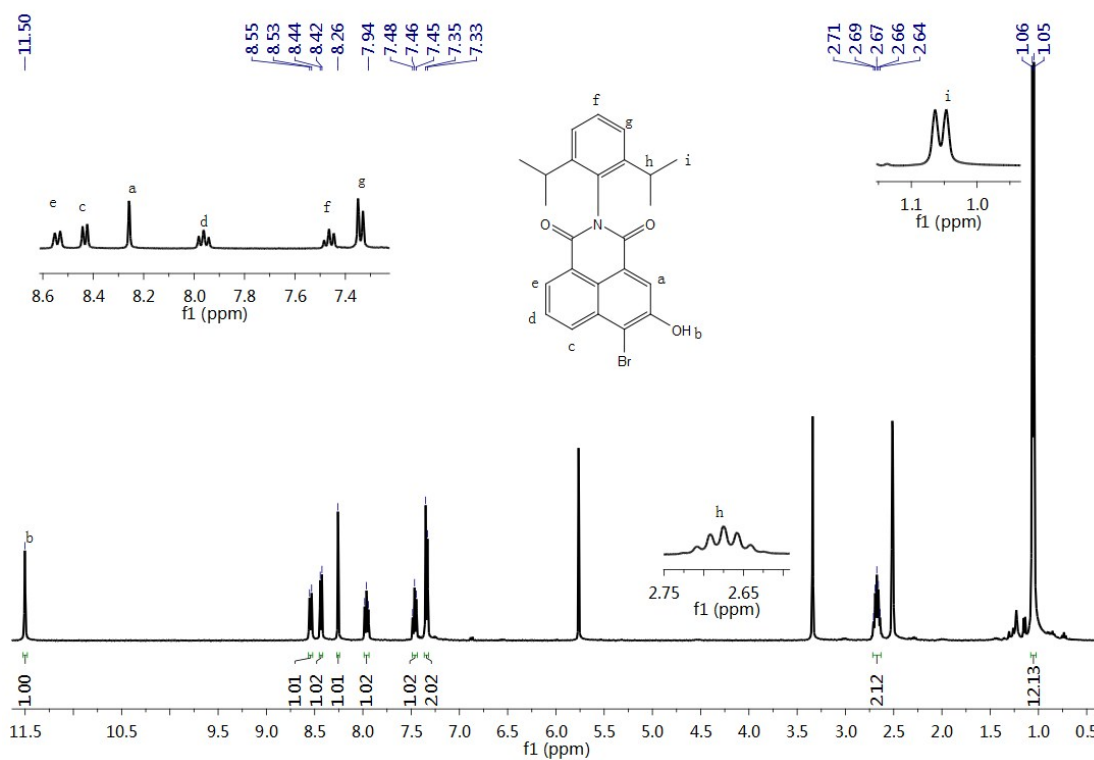

Figure S3. <sup>1</sup>H NMR spectrum of **3b** (400 MHz, d<sub>6</sub>-DMSO, 298K)

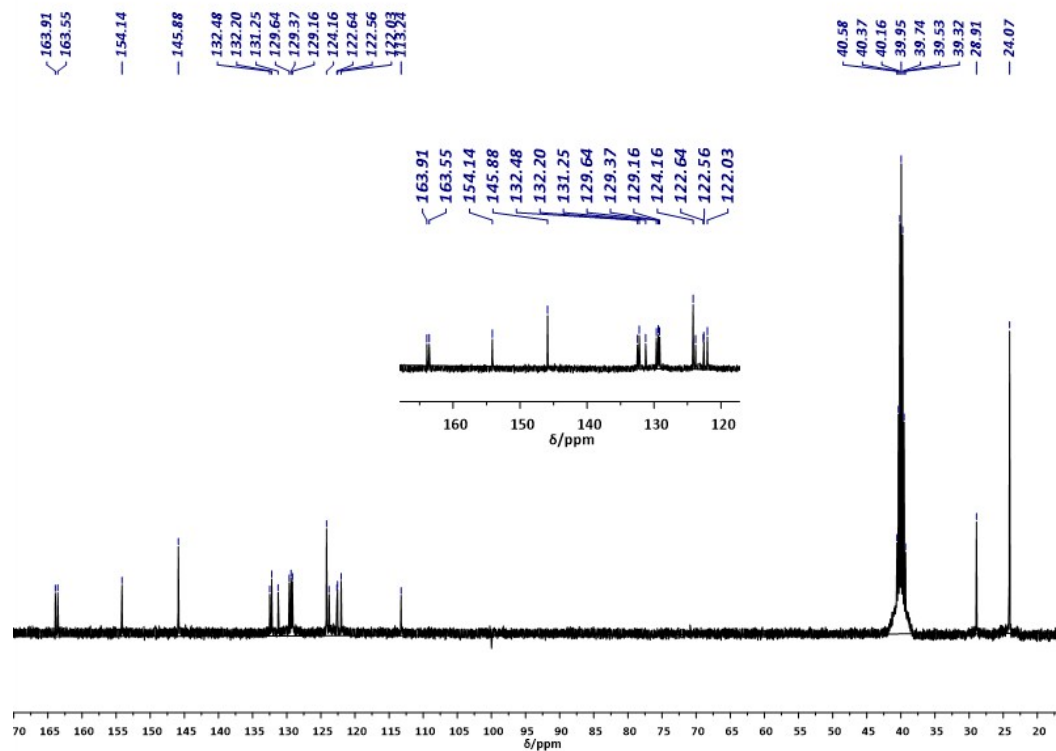

Figure S4. <sup>13</sup>C NMR spectrum of **3b** (100 MHz, d<sub>6</sub>-DMSO, 298K)

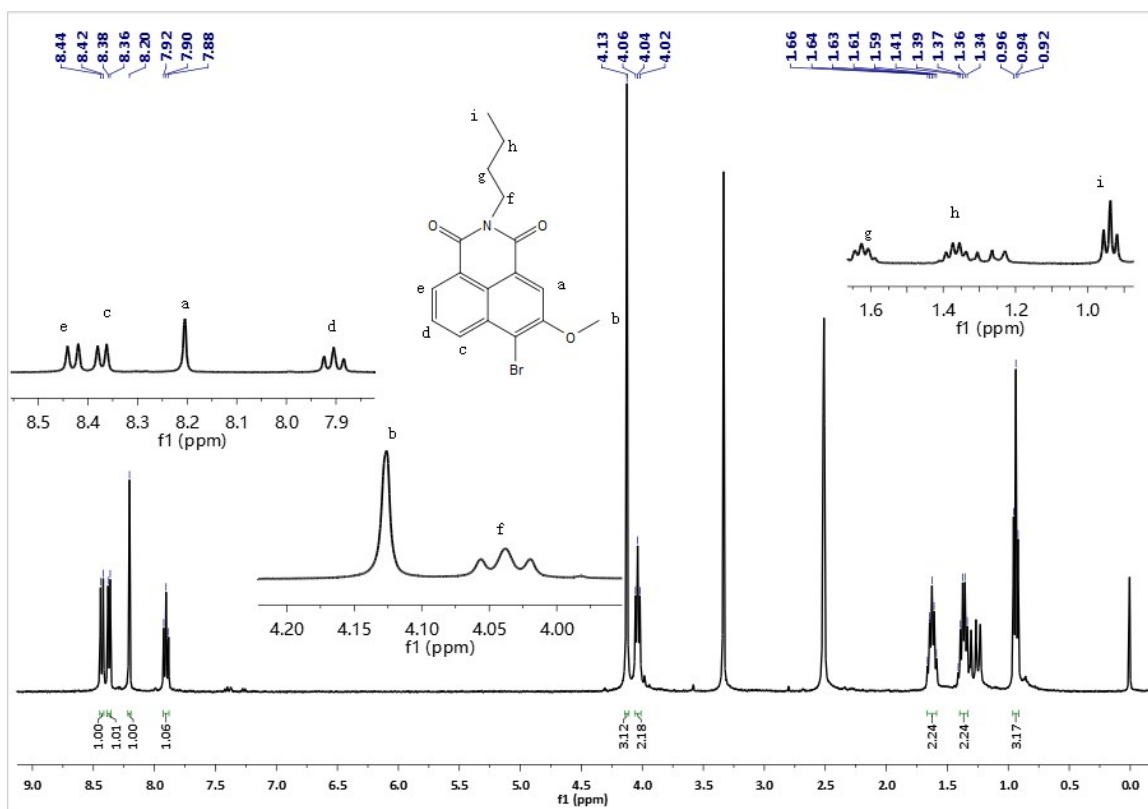

Figure S5. <sup>1</sup>H NMR spectrum of **4a** (400 MHz, d<sub>6</sub>-DMSO, 298K)

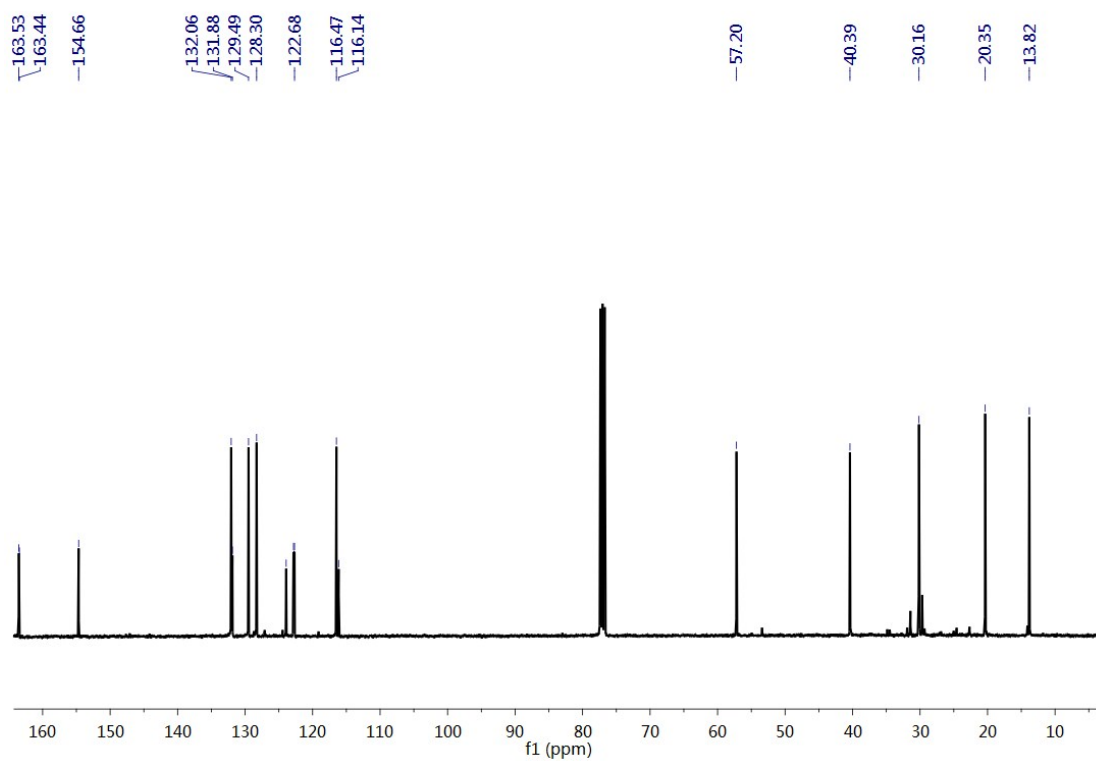

Figure S6. <sup>13</sup>C NMR spectrum of **4a** (100 MHz, CDCl<sub>3</sub>, 298K)

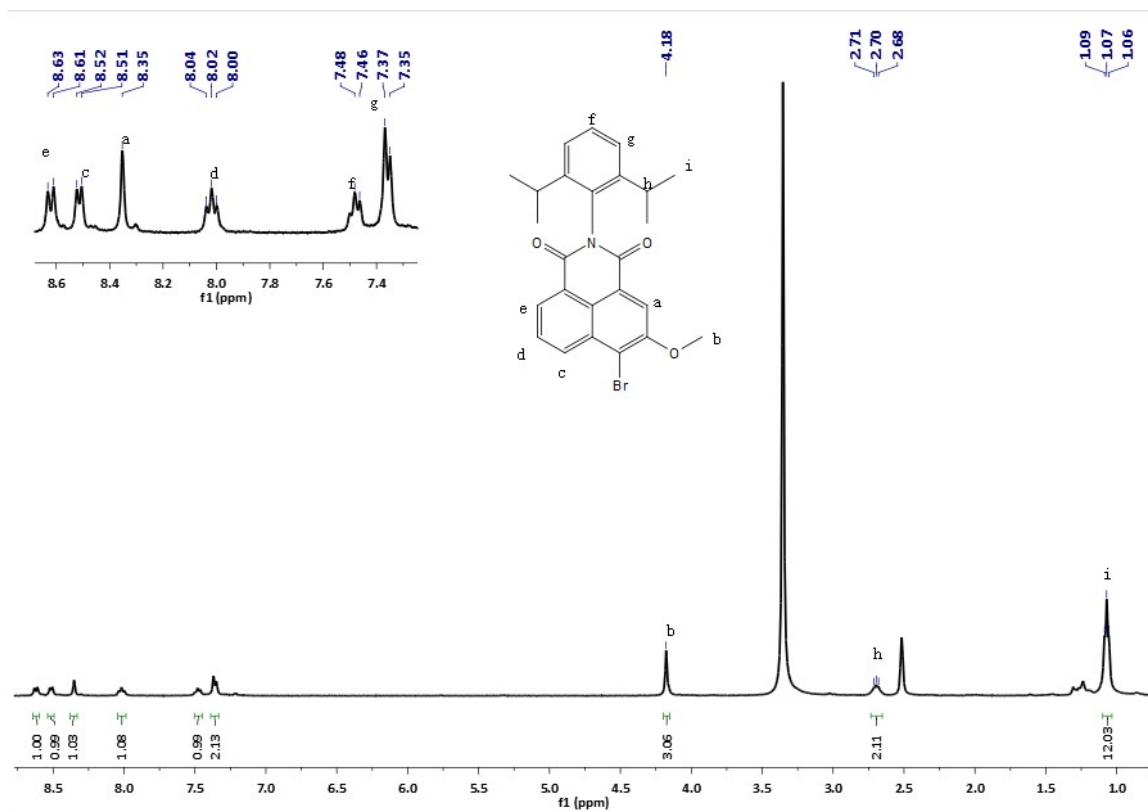

Figure S7. <sup>1</sup>H NMR spectrum of **4b** (400 MHz, d<sub>6</sub>-DMSO, 298K)

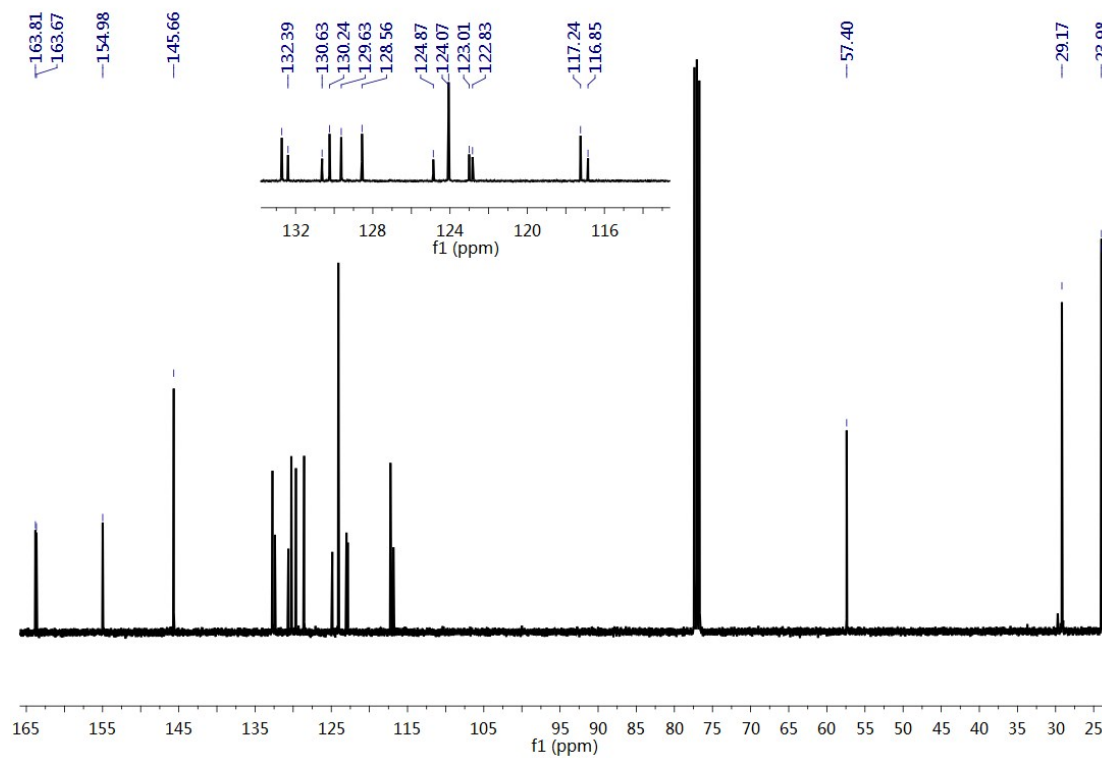

Figure S8. <sup>13</sup>C NMR spectrum of **4b** (100 MHz, CDCl<sub>3</sub>, 298K)

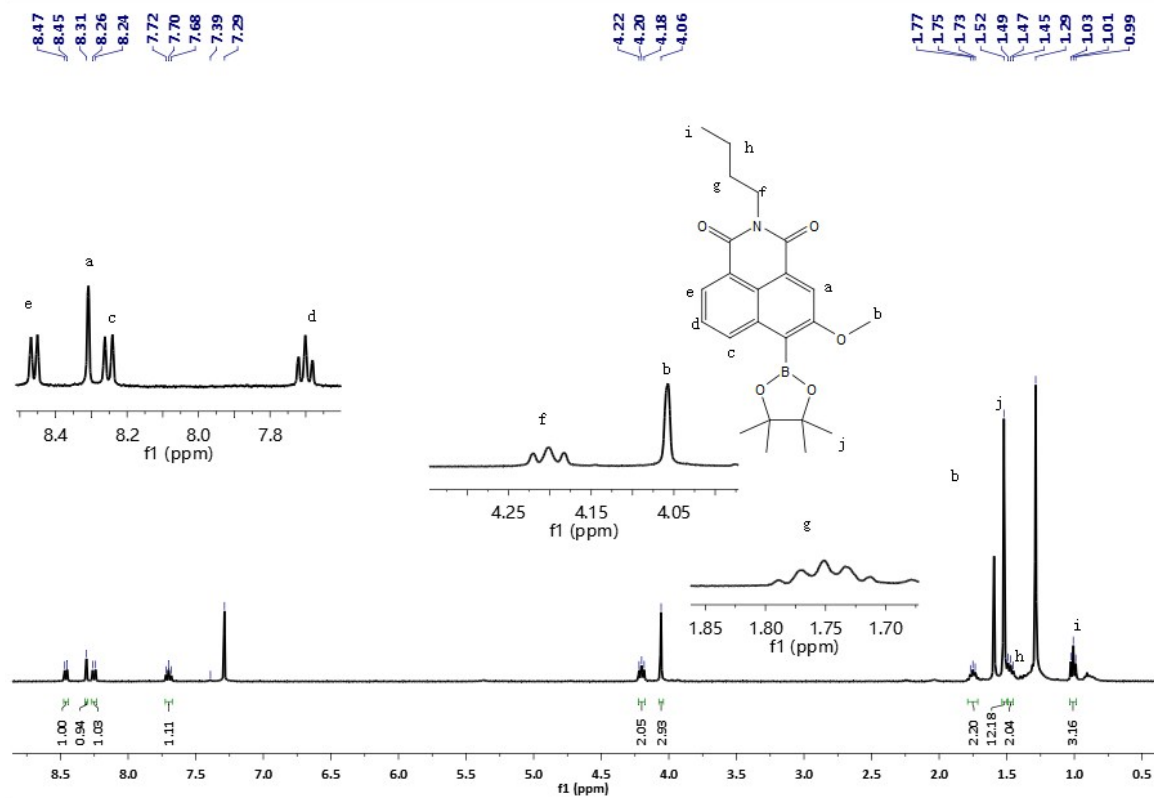

Figure S9. <sup>1</sup>H NMR spectrum of **5a** (400 MHz, CDCl<sub>3</sub>, 298K)

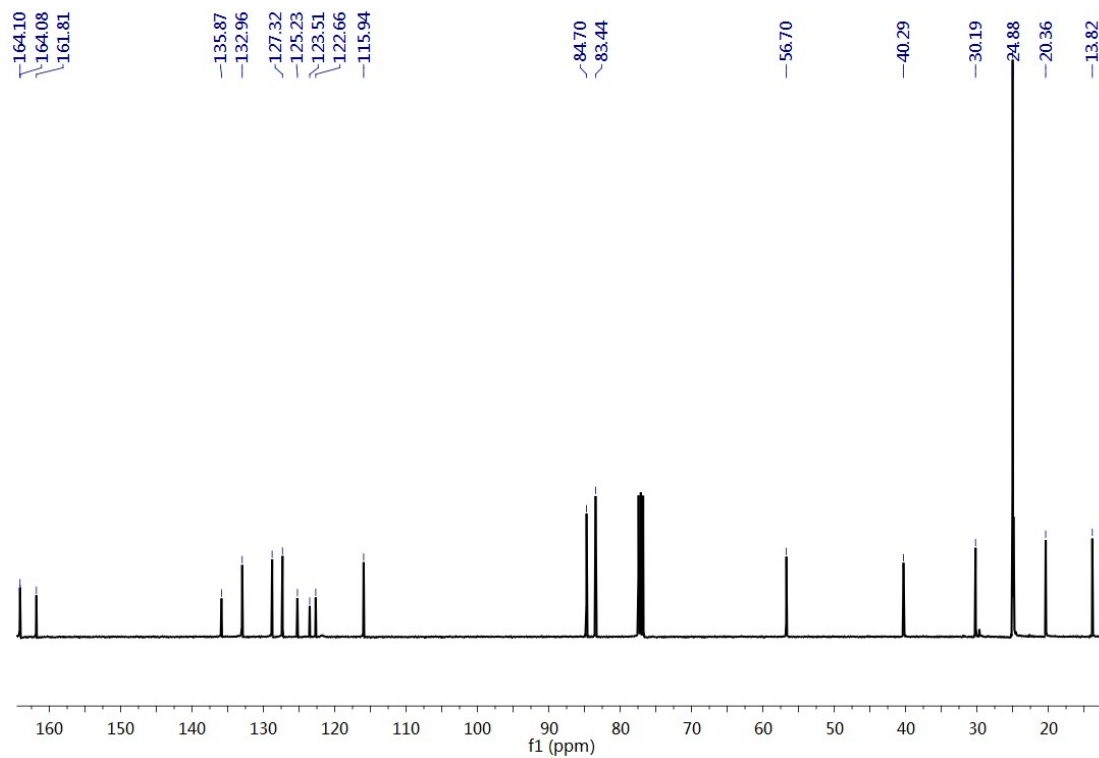

Figure S10. <sup>13</sup>C NMR spectrum of **5a** (100 MHz, CDCl<sub>3</sub>, 298K)

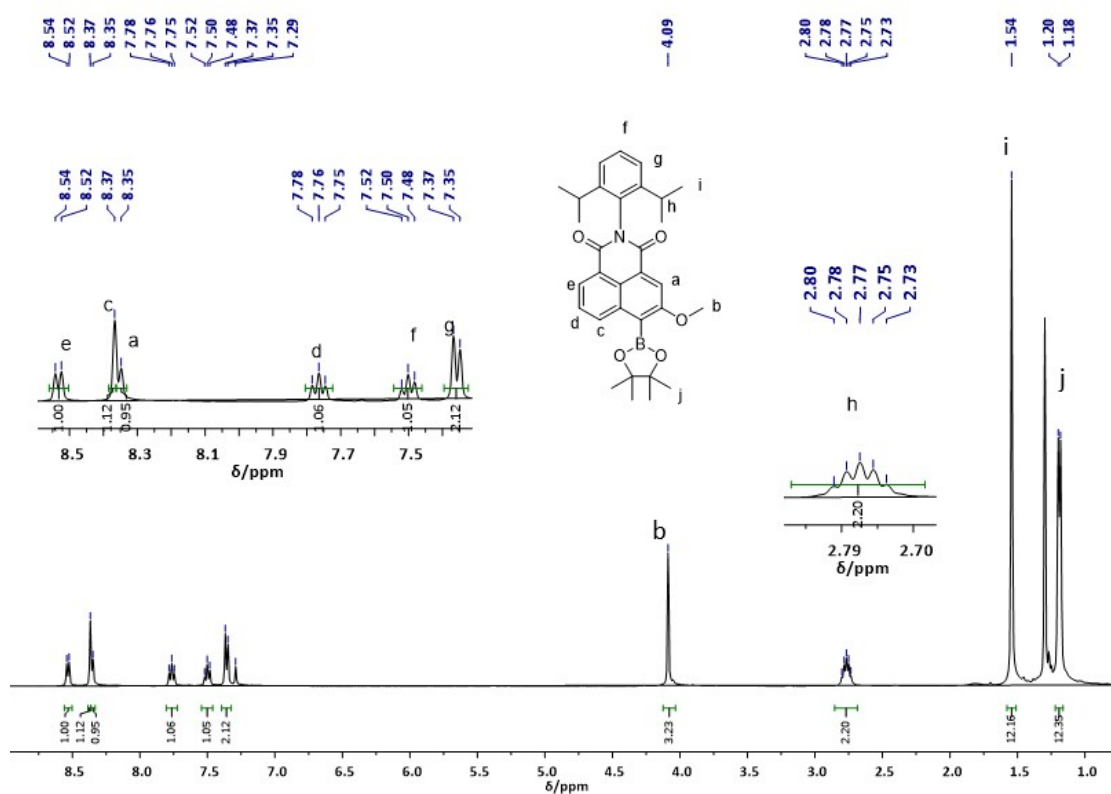

Figure S11. <sup>1</sup>H NMR spectrum of **5b** (400 MHz, d<sub>6</sub>-Acetone, 298K)

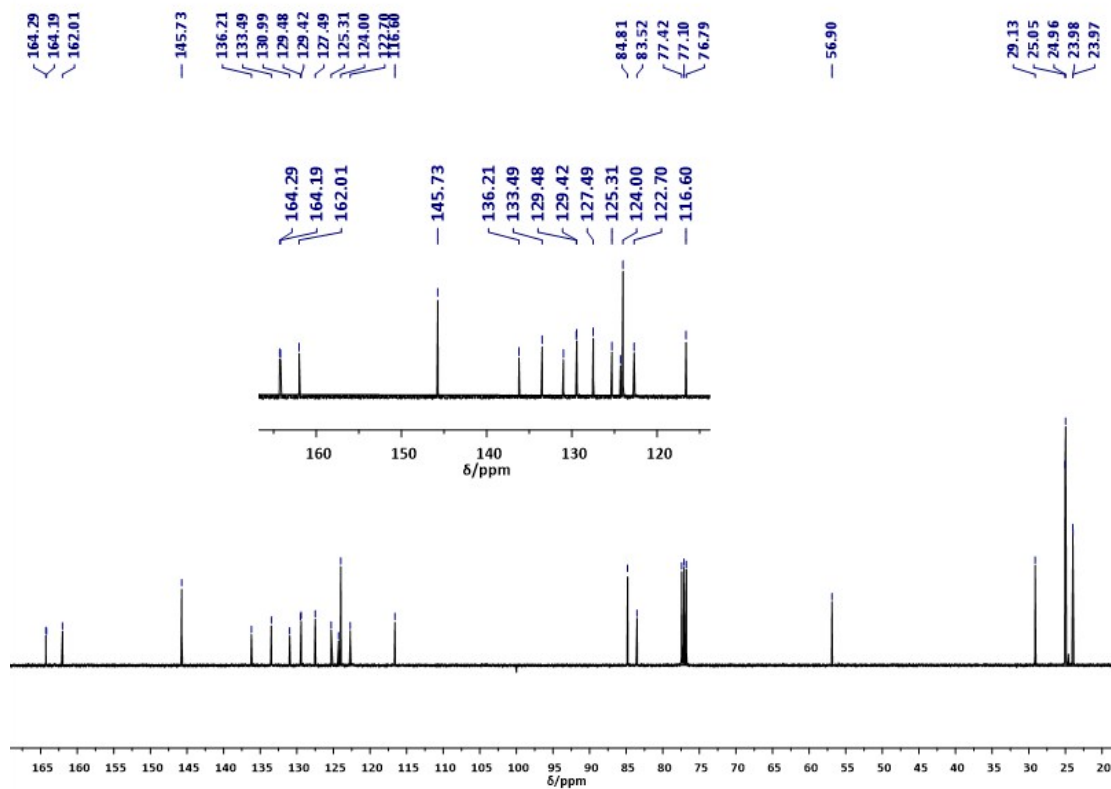

Figure S12. <sup>13</sup>C NMR spectrum of **5b** (100 MHz, CDCl<sub>3</sub>, 298K)

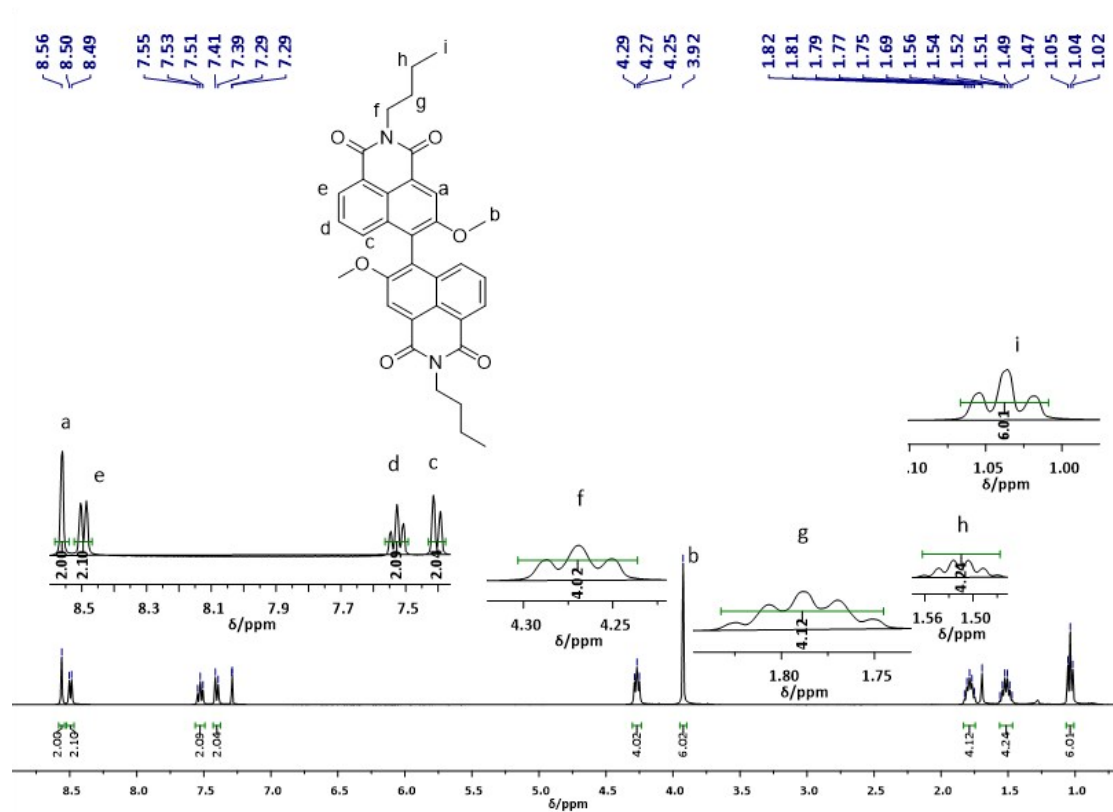

Figure S13.  $^1\text{H}$  NMR spectrum of **6a** (400 MHz,  $\text{CDCl}_3$ , 298K)

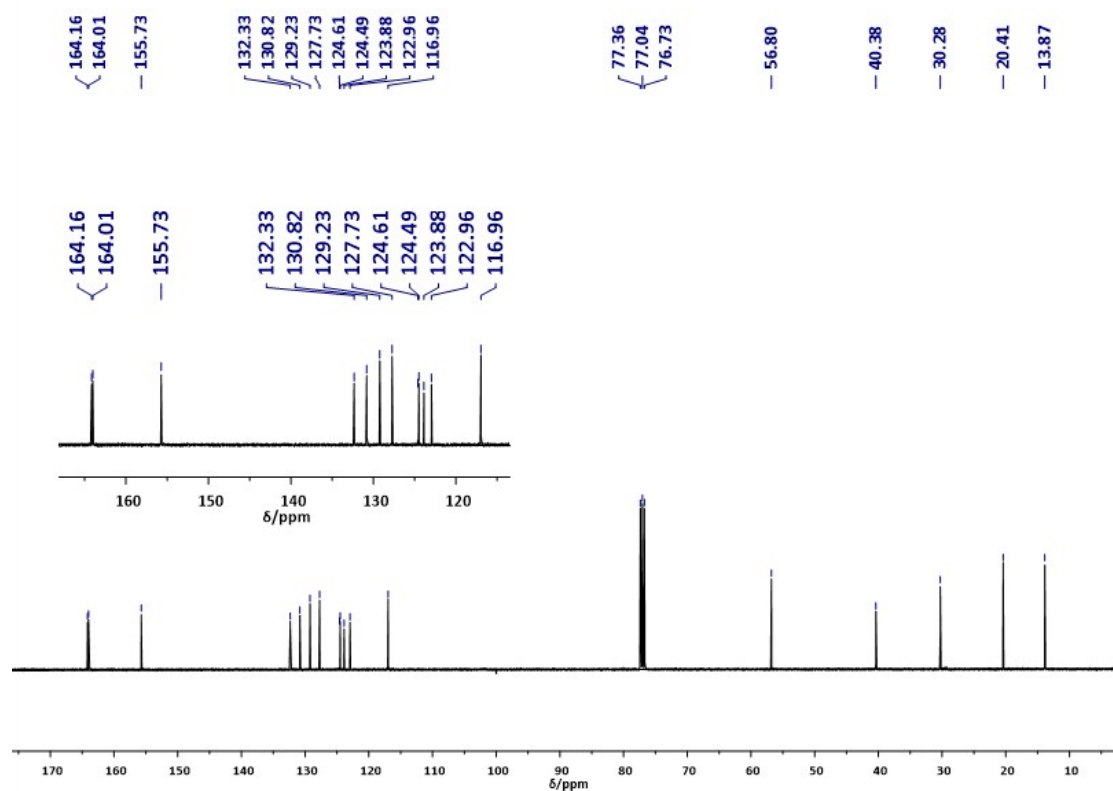

Figure S14.  $^{13}\text{C}$  NMR spectrum of **6a** (100 MHz,  $\text{CDCl}_3$ , 298K)



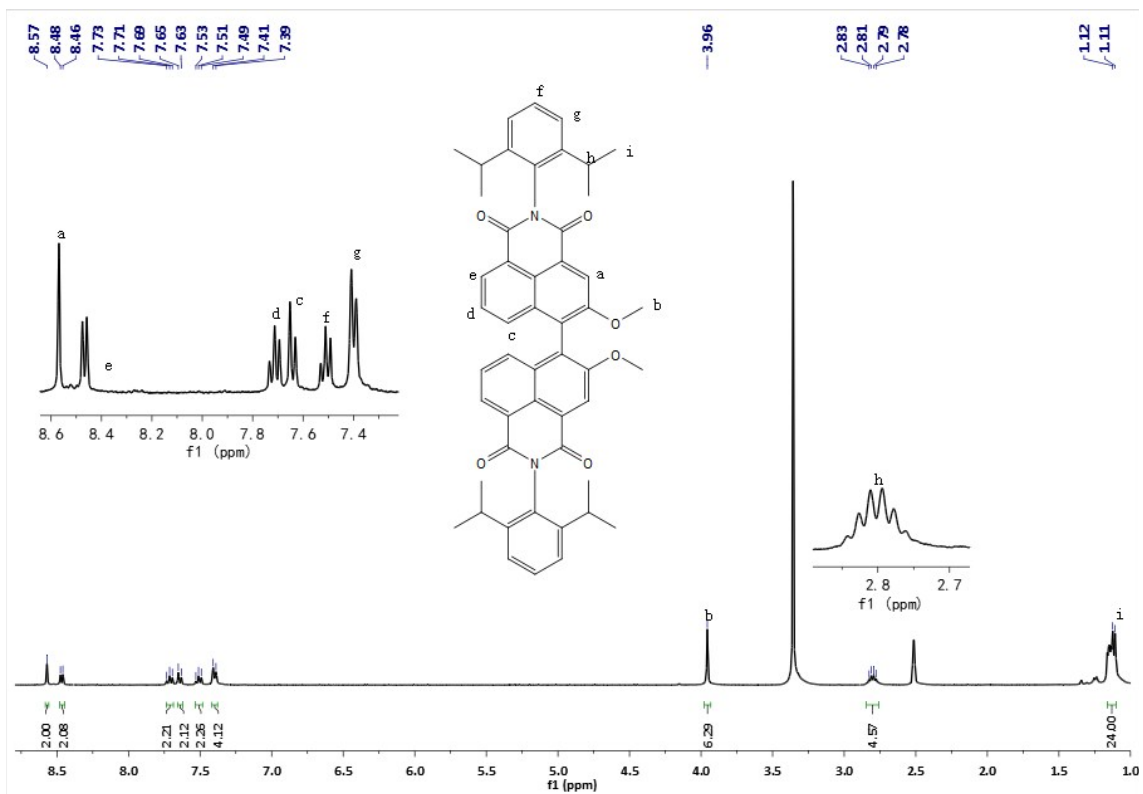

Figure S15. <sup>1</sup>H NMR spectrum of **6b** (400 MHz, d<sub>6</sub>-DMSO, 298K)

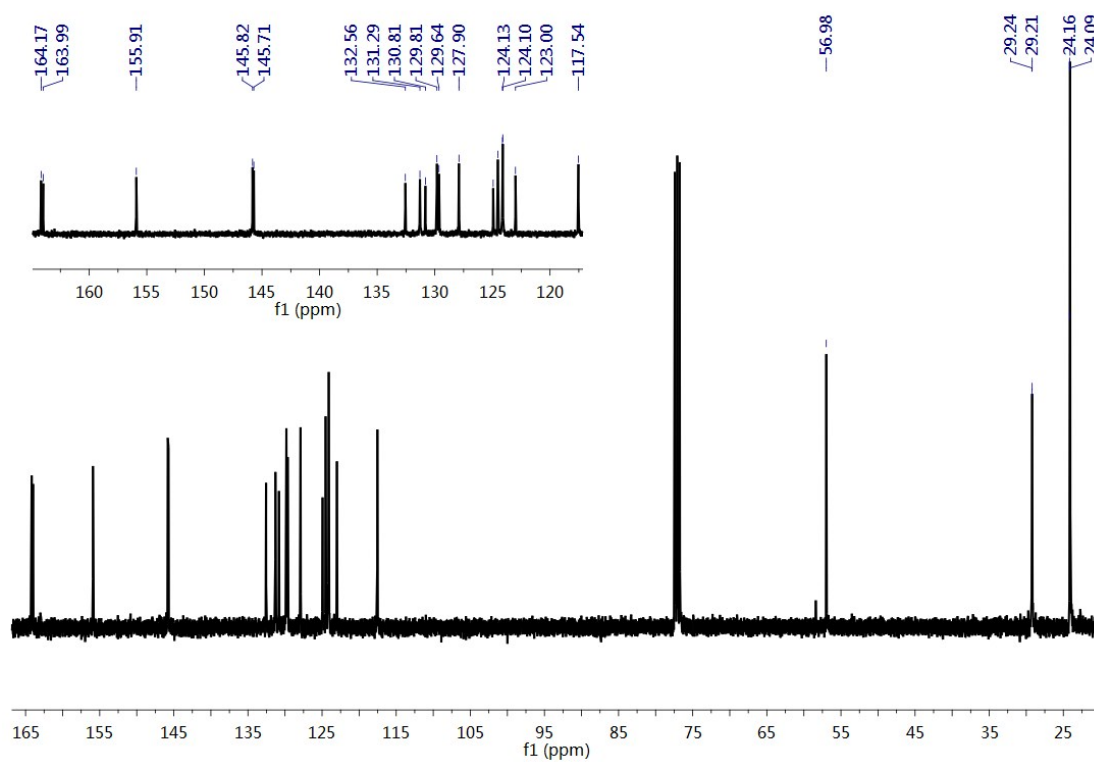

Figure S16. <sup>13</sup>C NMR spectrum of **6b** (100 MHz, CDCl<sub>3</sub>, 298K)

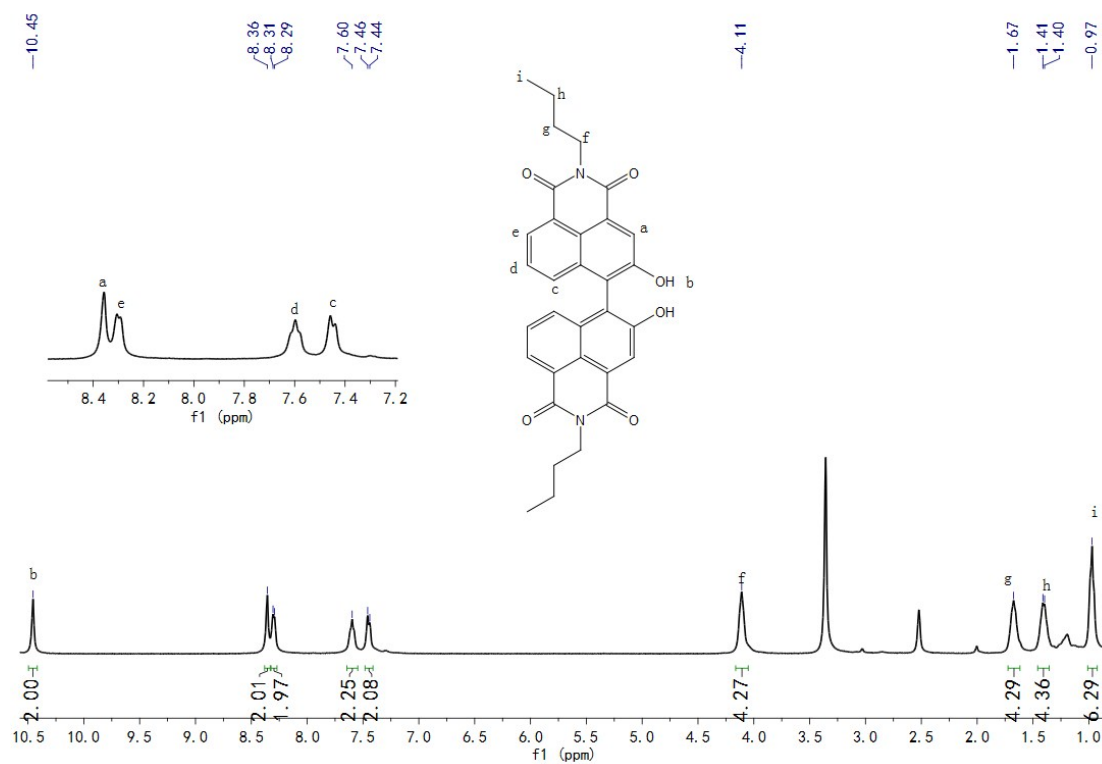

Figure S17. <sup>1</sup>H NMR spectrum of **1a** (400 MHz, d<sub>6</sub>-DMSO, 298K)

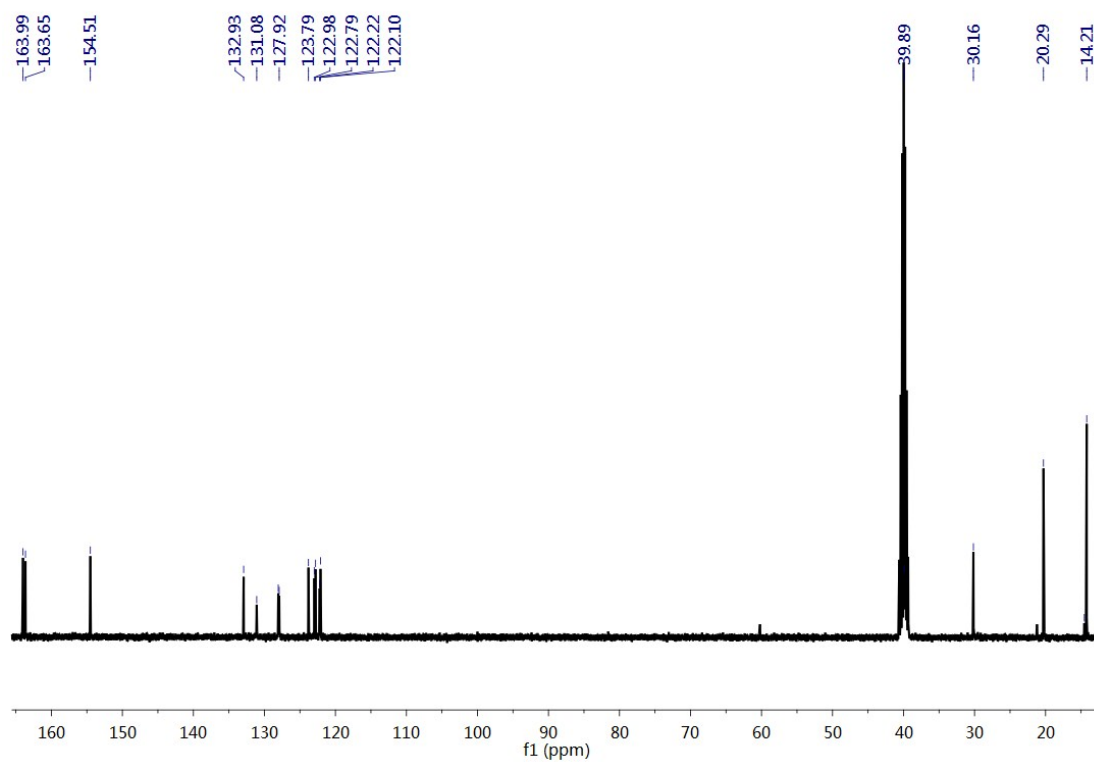

Figure S18. <sup>13</sup>C NMR spectrum of **1a** (100 MHz, d<sub>6</sub>-DMSO, 298K)

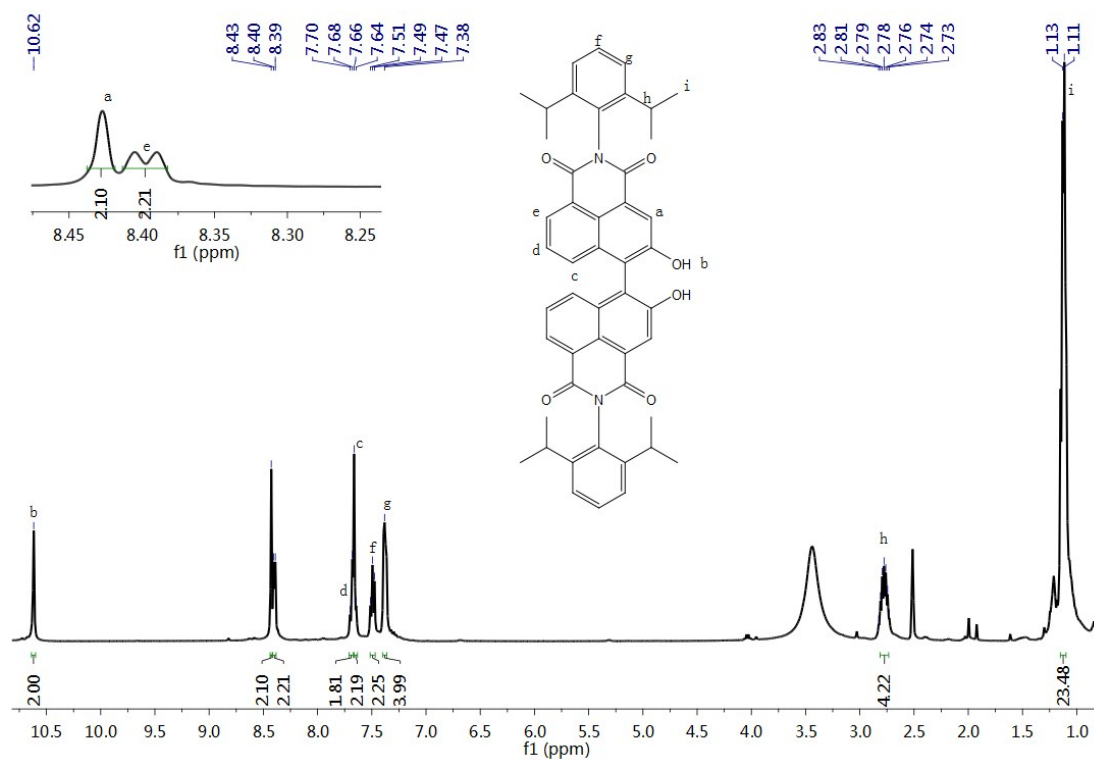

Figure S19. <sup>1</sup>H NMR spectrum of **1b** (400 MHz, d<sub>6</sub>-DMSO, 298K)

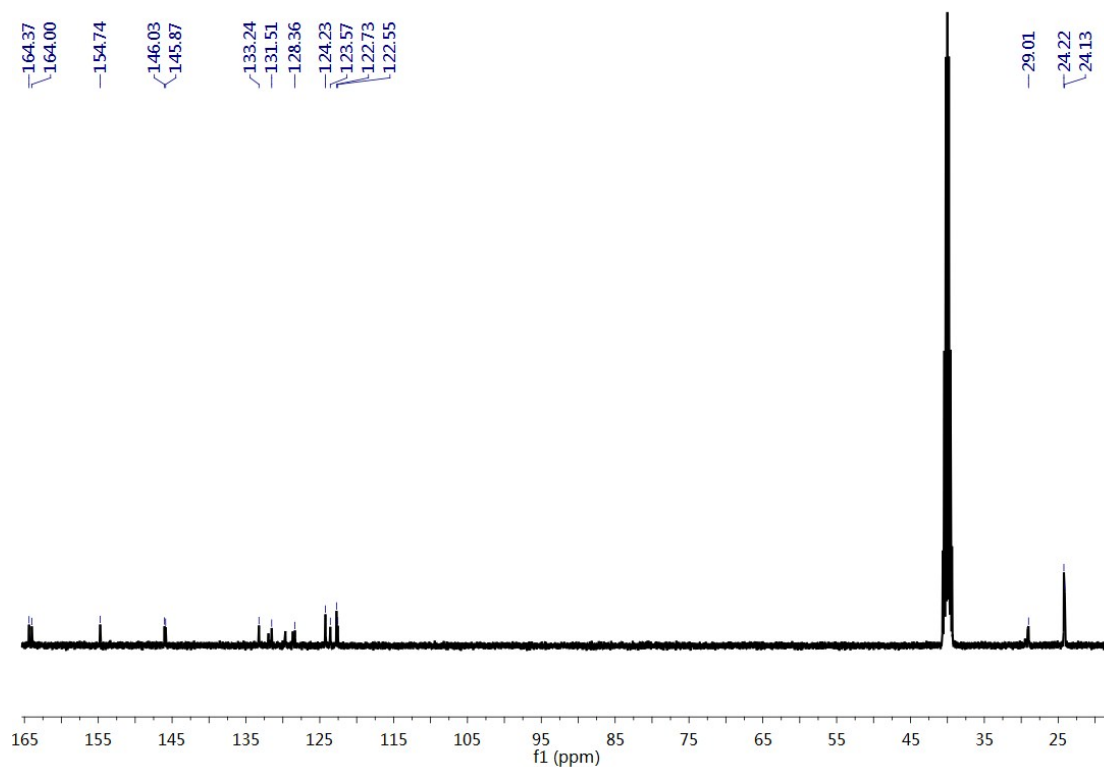

Figure S20. <sup>13</sup>C NMR spectrum of **1b** (100 MHz, d<sub>6</sub>-DMSO, 298K)

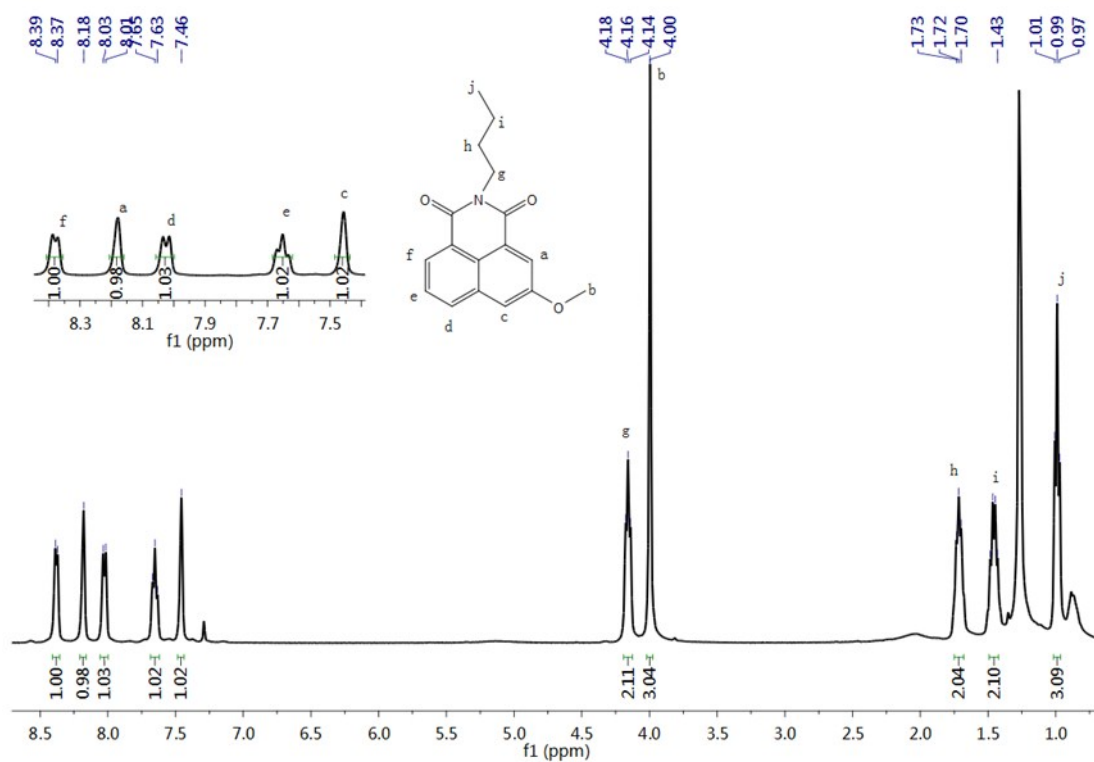

Figure S21. <sup>1</sup>H NMR spectrum of **7a** (400 MHz, CDCl<sub>3</sub>, 298K)

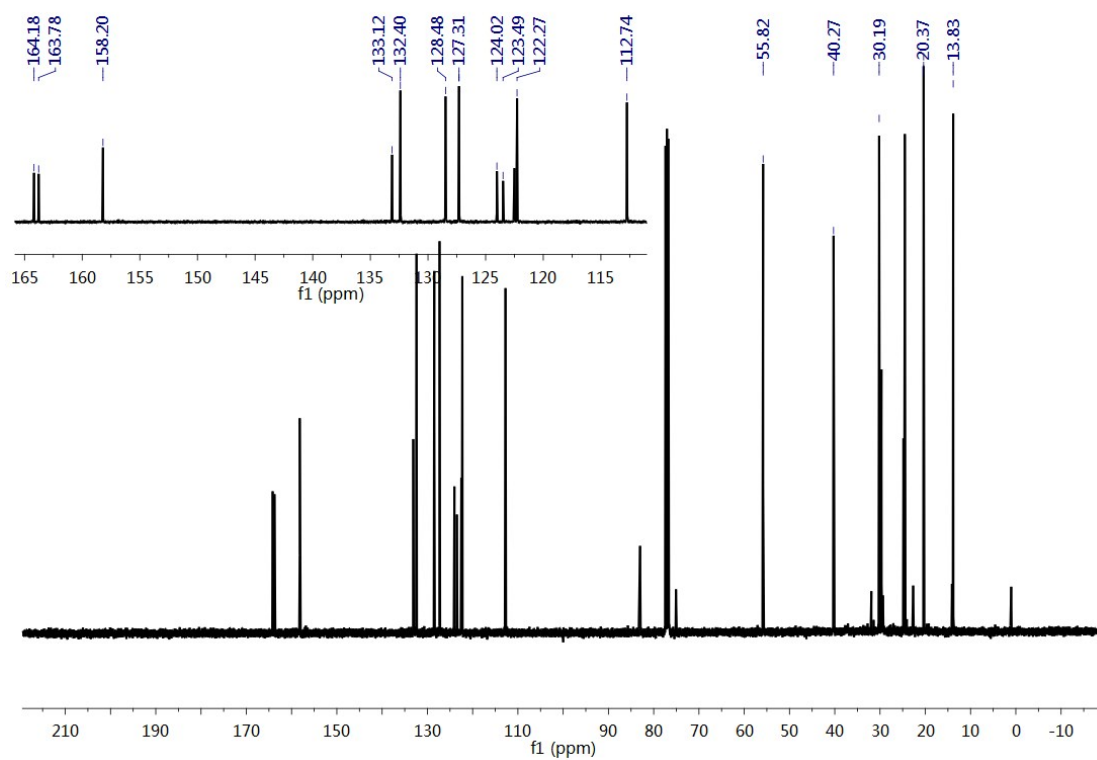

Figure S22. <sup>13</sup>C NMR spectrum of **7a** (100 MHz, CDCl<sub>3</sub>, 298K)

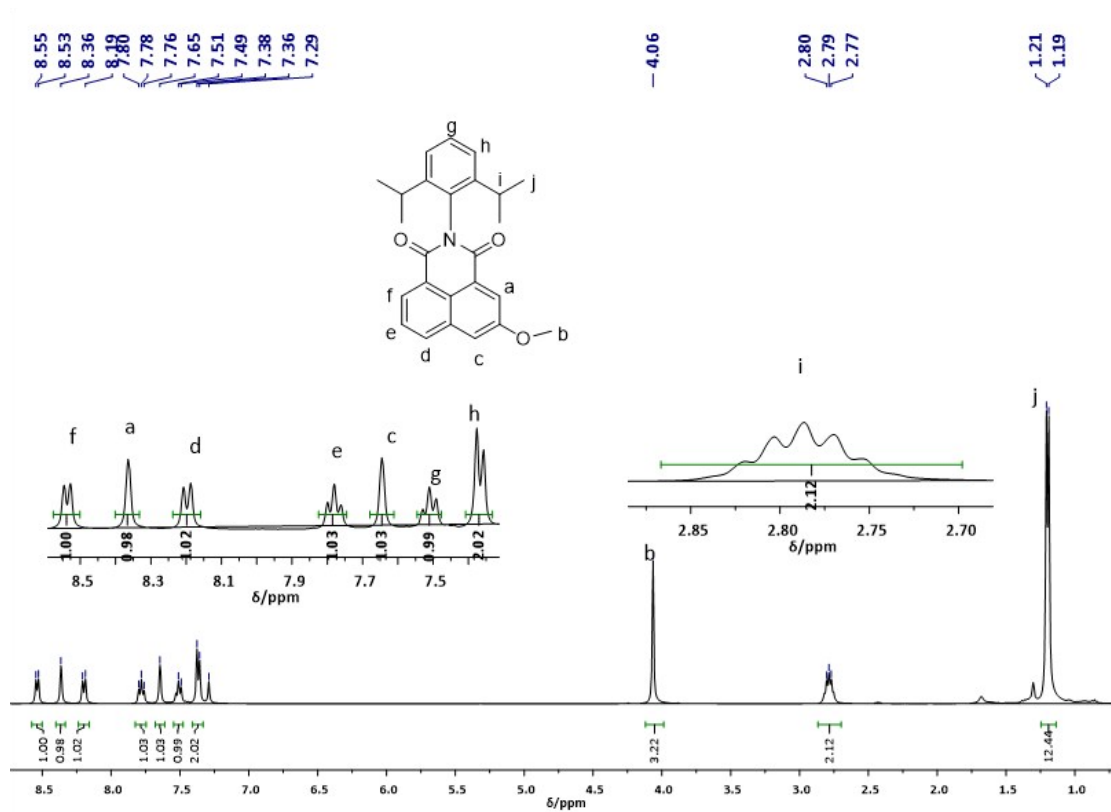

Figure S23.  $^1\text{H}$  NMR spectrum of **7b** (400 MHz,  $\text{CDCl}_3$ , 298K)

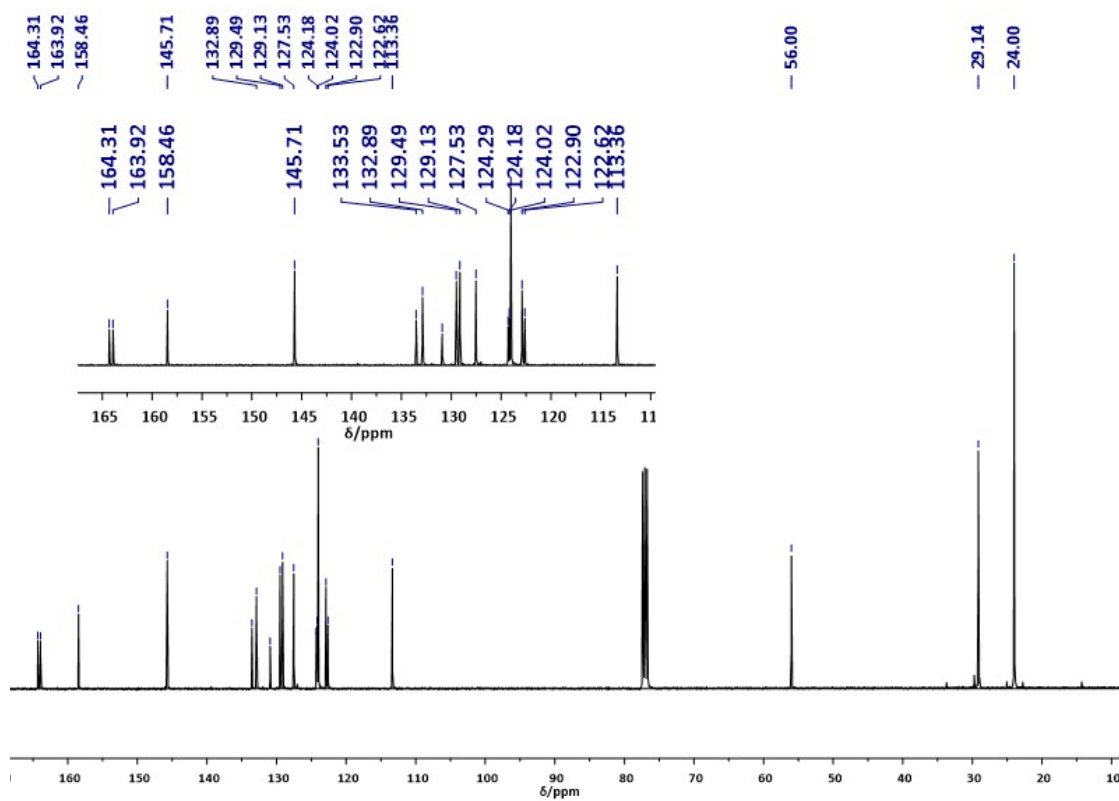

Figure S24.  $^{13}\text{C}$  NMR spectrum of **7b** (100 MHz,  $\text{CDCl}_3$ , 298K)

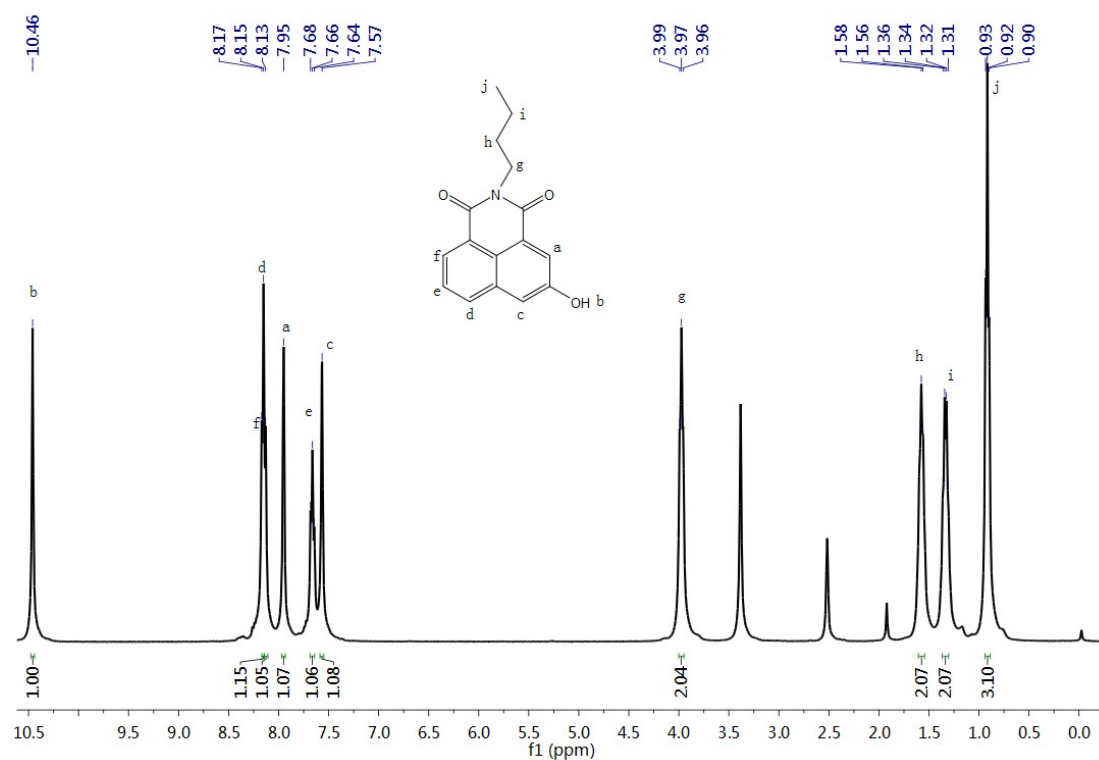

Figure S25. <sup>1</sup>H NMR spectrum of **8a** (400 MHz, d<sub>6</sub>-DMSO, 298K)

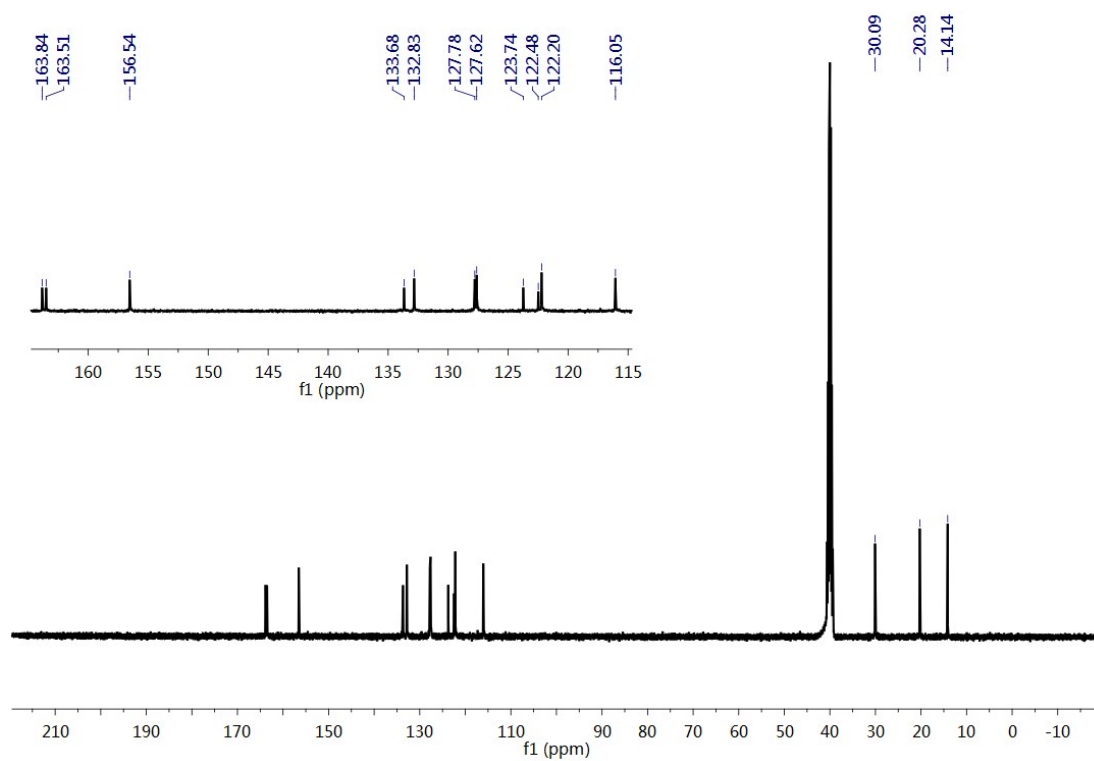

Figure S26. <sup>13</sup>C NMR spectrum of **8a** (100 MHz, d<sub>6</sub>-DMSO, 298K)

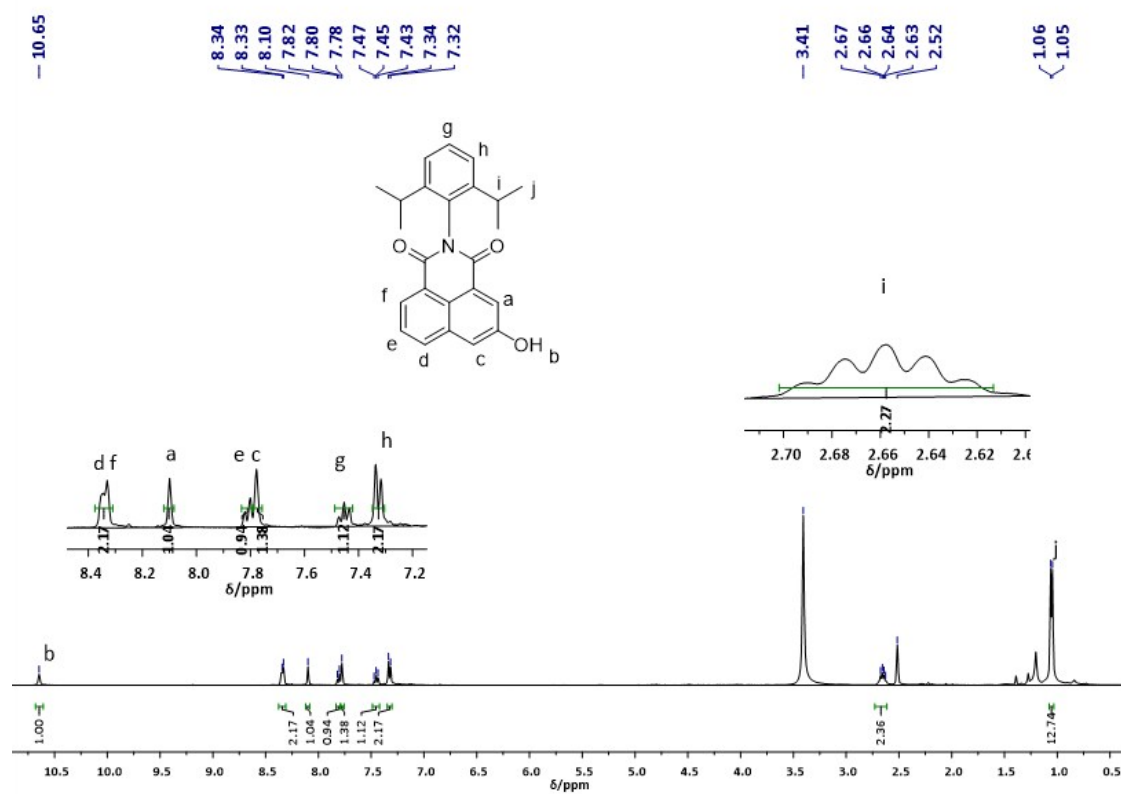

Figure S27. <sup>1</sup>H NMR spectrum of **8b** (400 MHz, d<sub>6</sub>-DMSO, 298K)

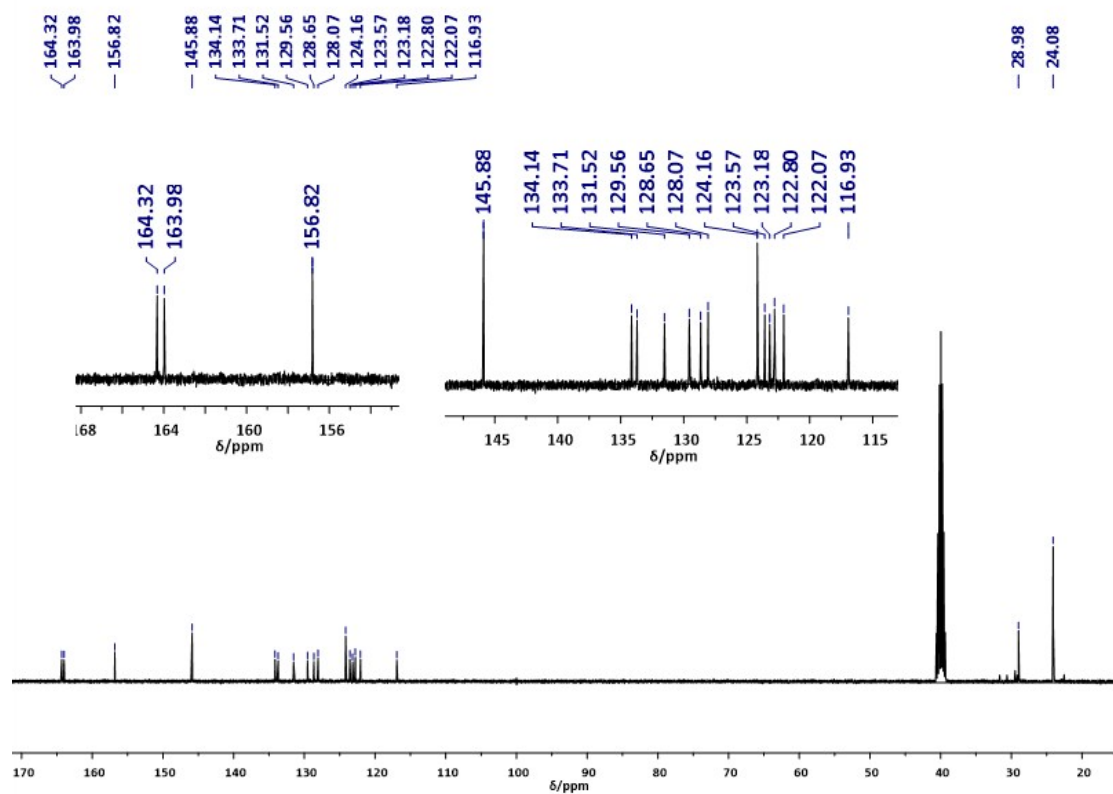

Figure S28. <sup>13</sup>C NMR spectrum of **8b** (100 MHz, d<sub>6</sub>-DMSO, 298K)

## 2. High-resolution mass spectra (HRMS)

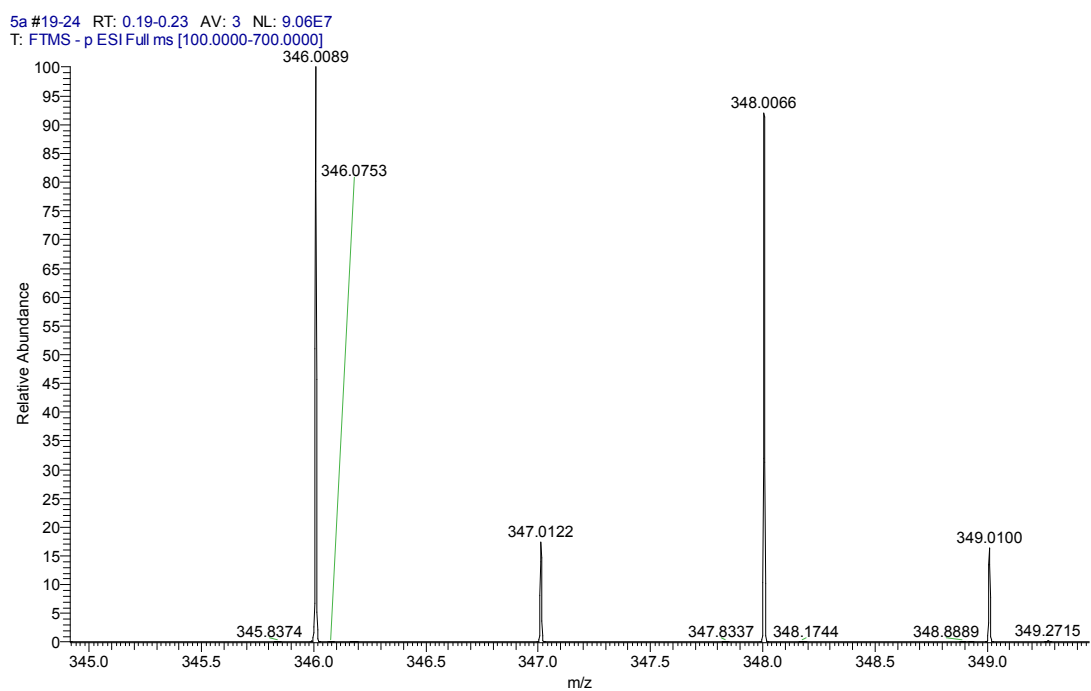

Figure S29. ESI mass spectrum of **3a** in DMSO in negative mode

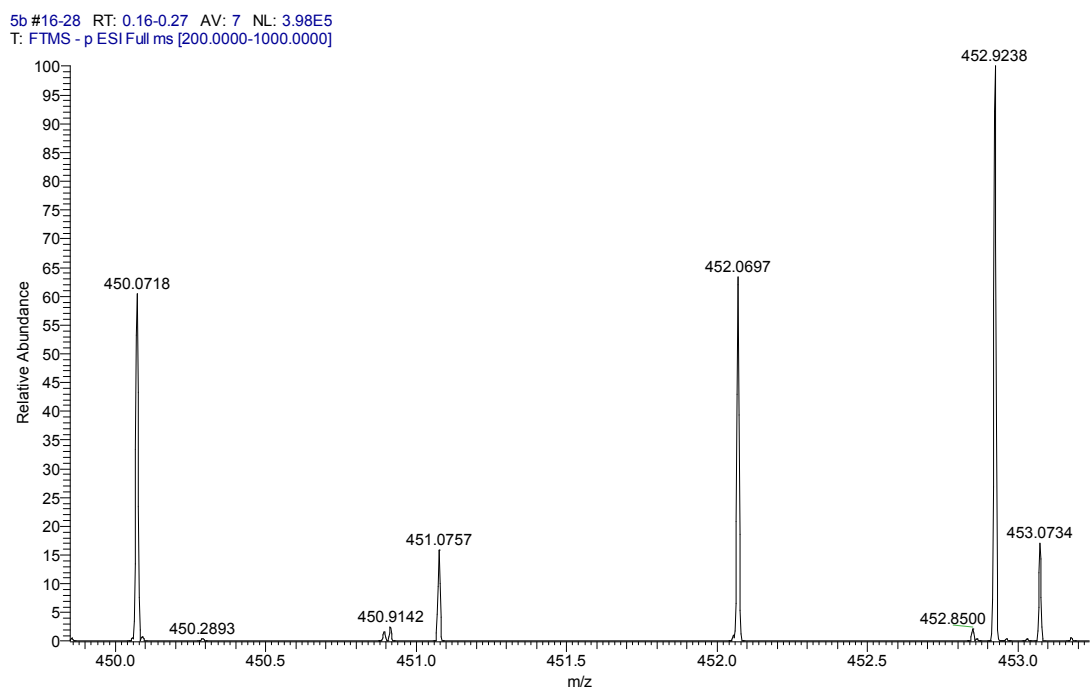

Figure S30. ESI mass spectrum of **3b** in DMSO in negative mode



6a #16-27 RT: 0.16-0.26 AV: 6 NL: 7.94E7  
T: FTMS + p ESI Full ms [100.00-500.00]

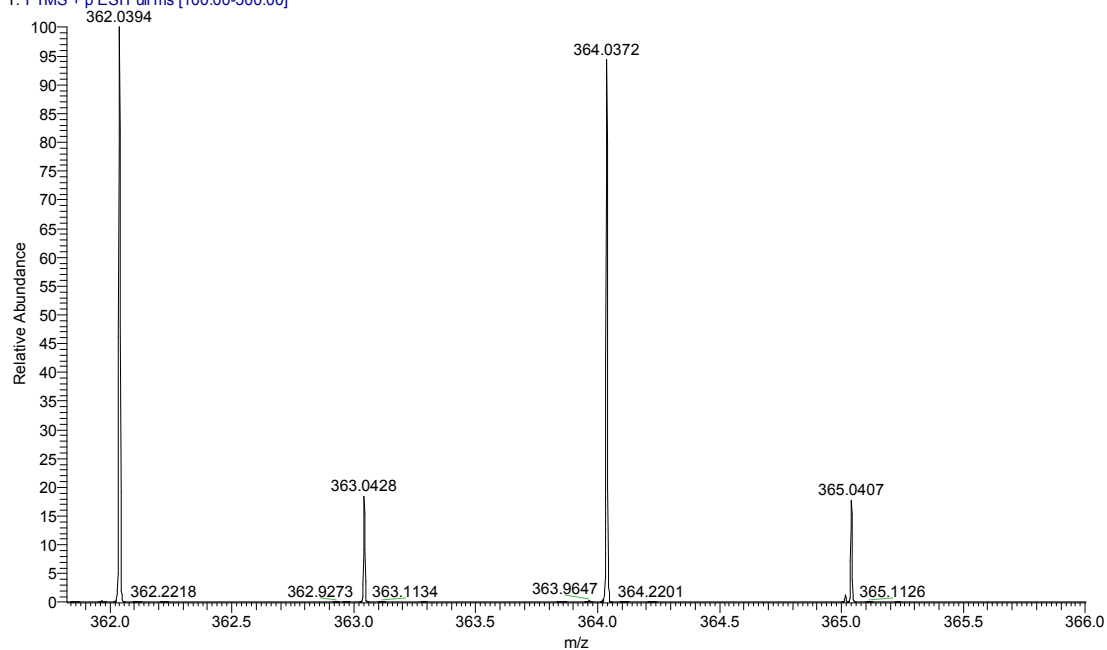

Figure S31. ESI mass spectrum of 4a in DCM in positive mode

6b #13-22 RT: 0.13-0.21 AV: 5 NL: 7.01E7  
T: FTMS + p ESI Full ms [200.0000-1000.0000]

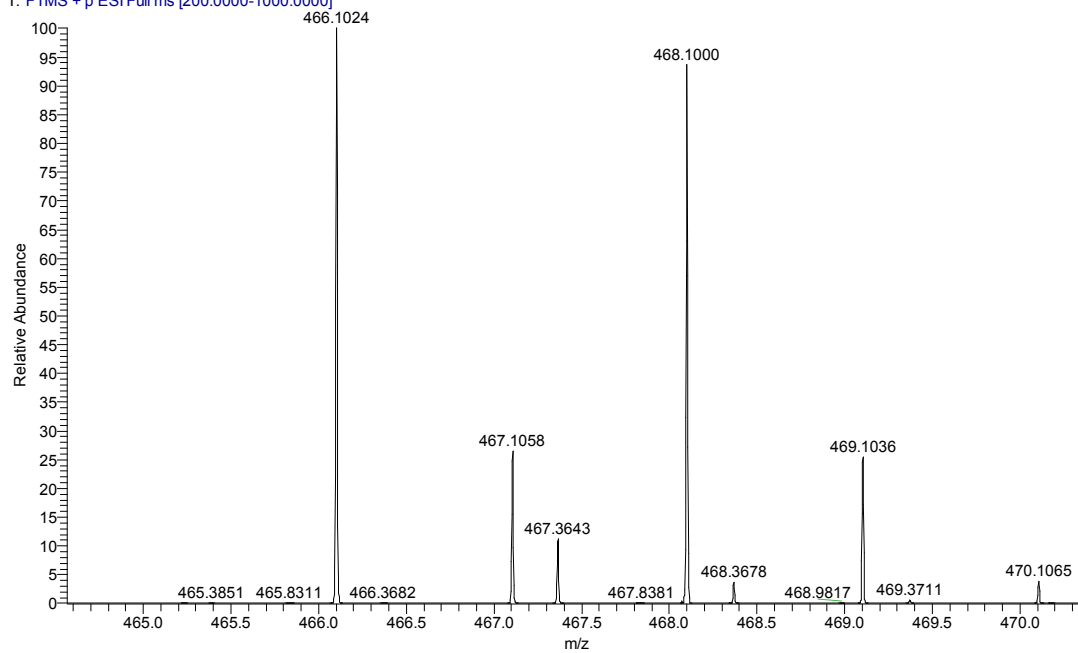

Figure S32. ESI mass spectrum of 4b in DCM in positive mode

7a #38-55 RT: 0.38-0.53 AV: 9 NL: 6.38E8  
T: FTMS + p ESI Full ms [200.0000-600.0000]

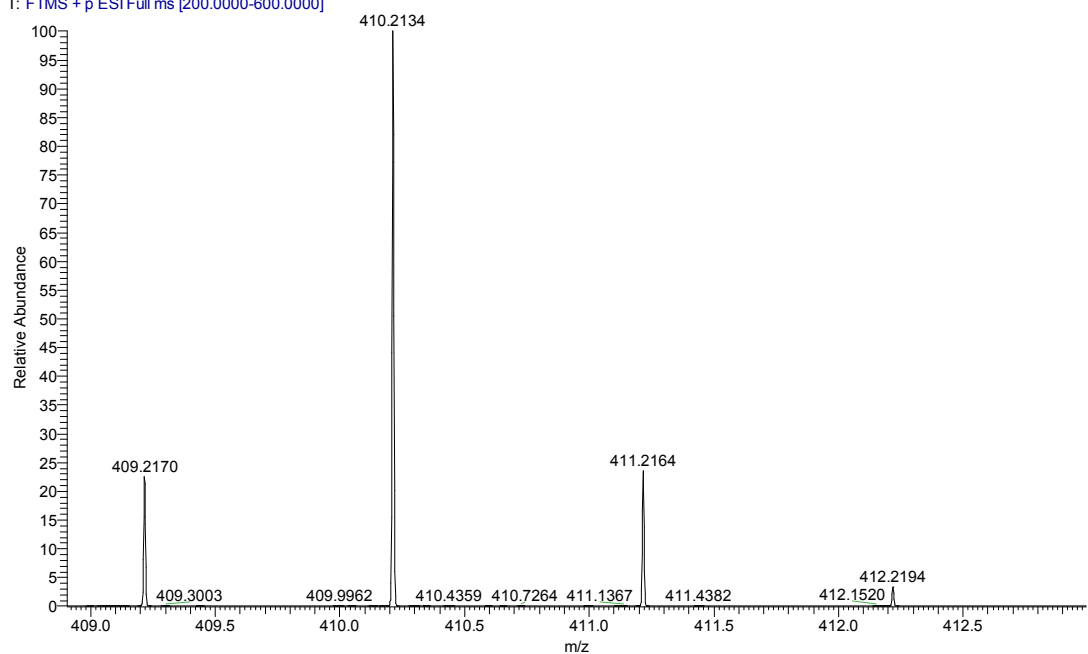

Figure S33. ESI mass spectrum of 5a in DCM in positive mode

7b #16-37 RT: 0.15-0.34 AV: 11 NL: 6.05E8  
T: FTMS + p ESI Full ms [100.0000-1200.0000]

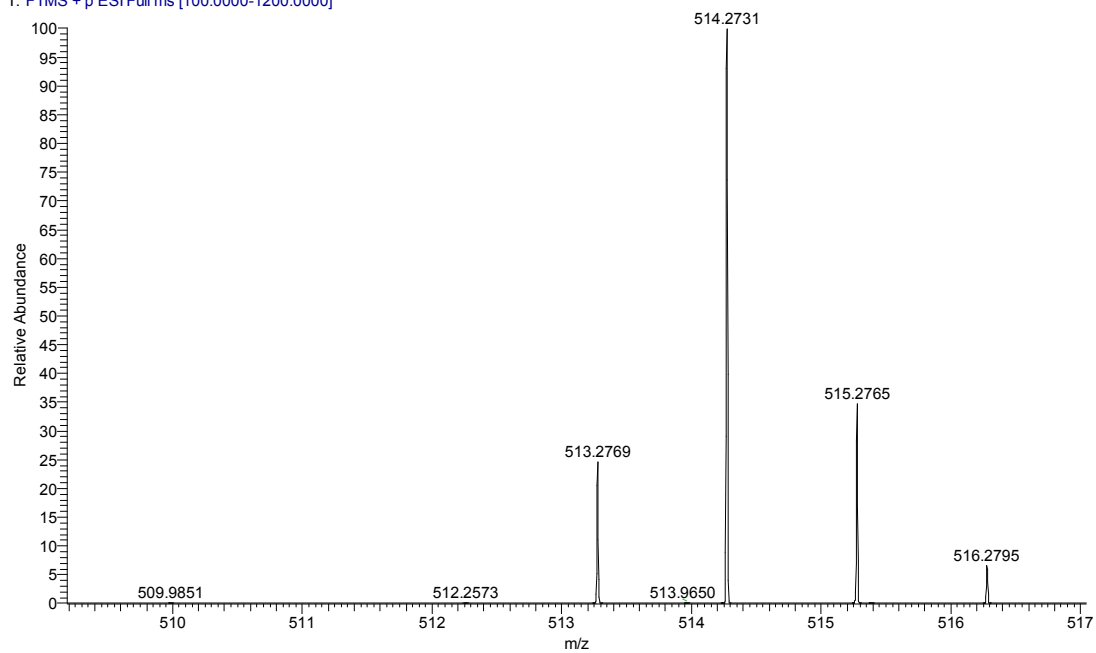

Figure S34. ESI mass spectrum of 5b in DCM in positive mode

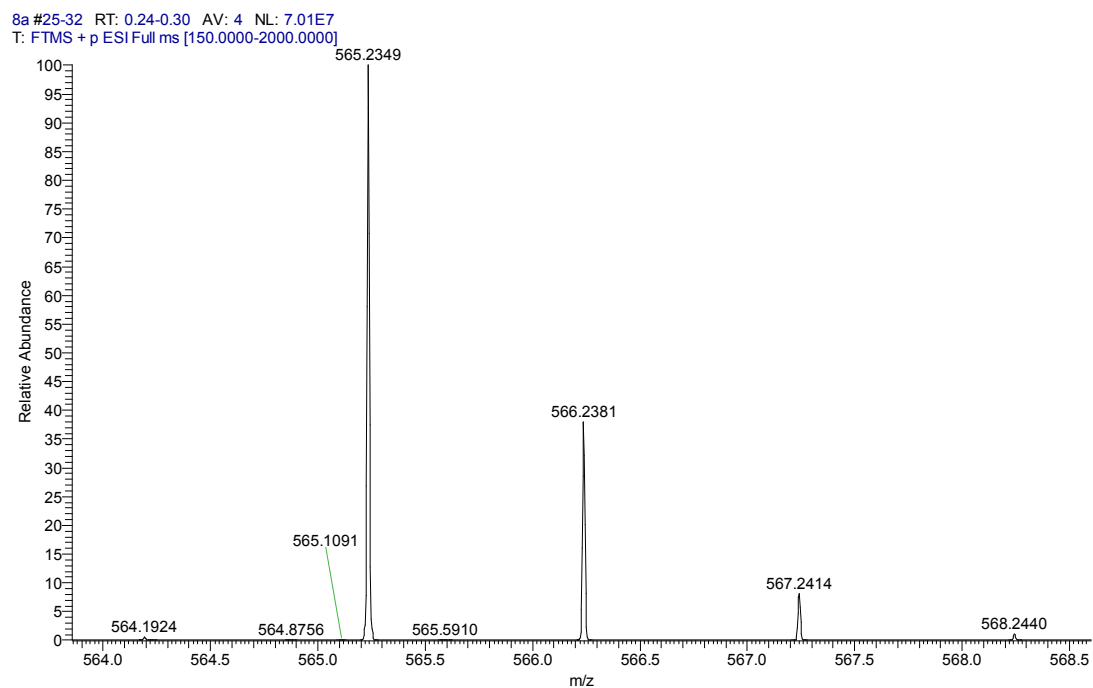

Figure S35. ESI mass spectrum of **6a** in DCM in positive mode

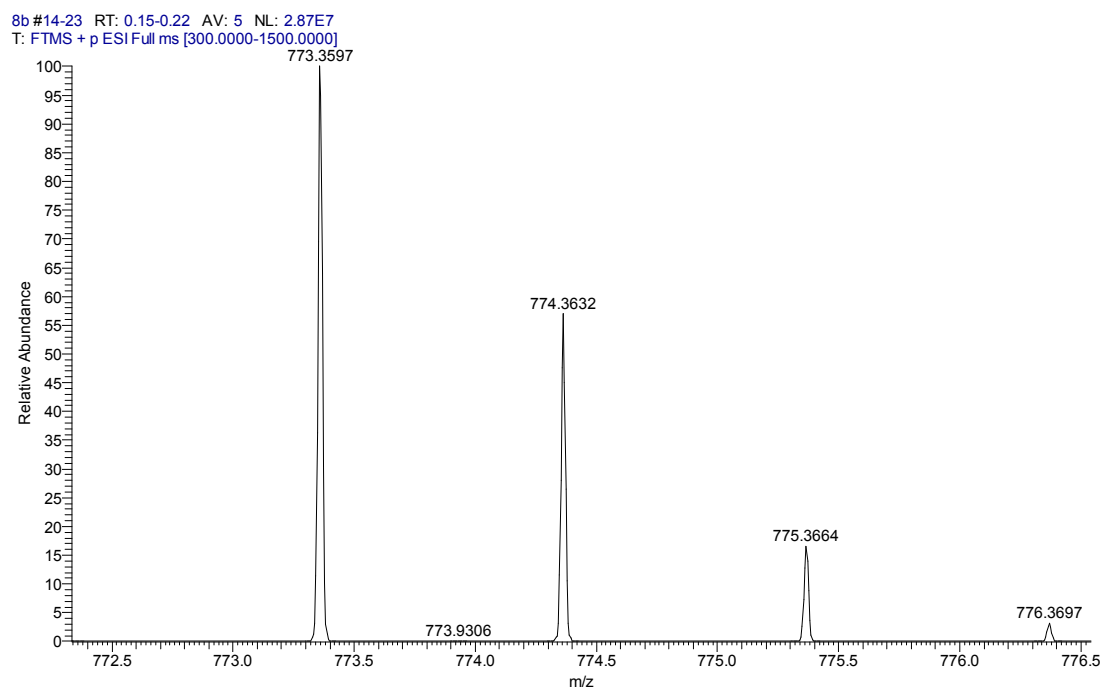

Figure S36. ESI mass spectrum of **6b** in DCM in positive mode

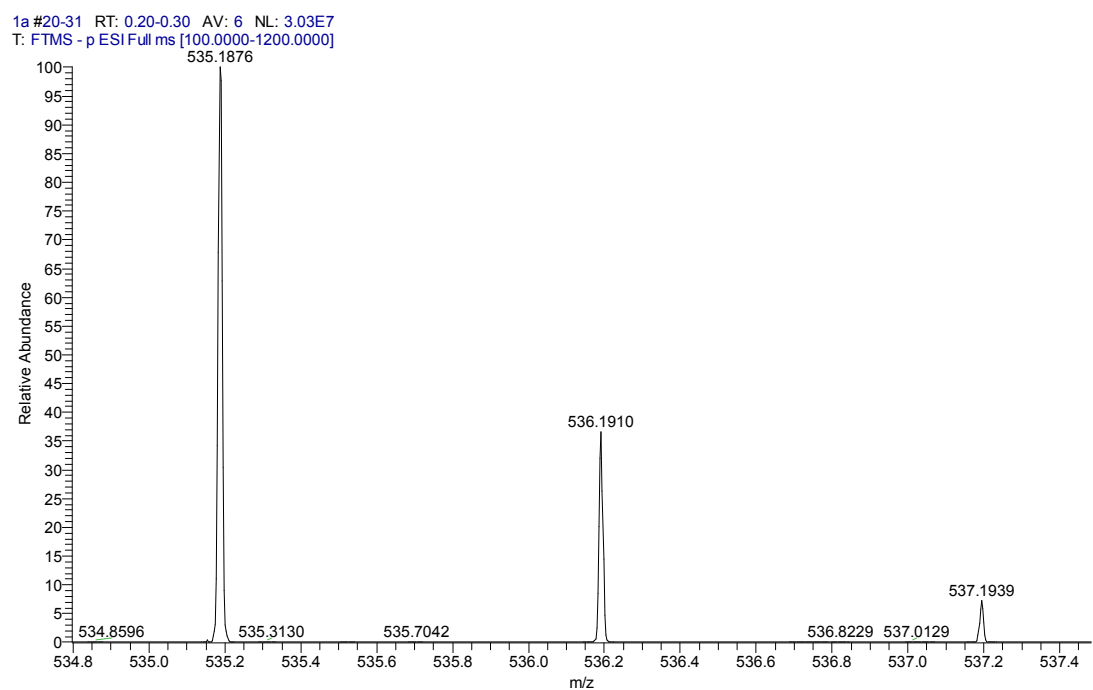

**Figure S37.** ESI mass spectrum of **1a** in DMSO in negative mode

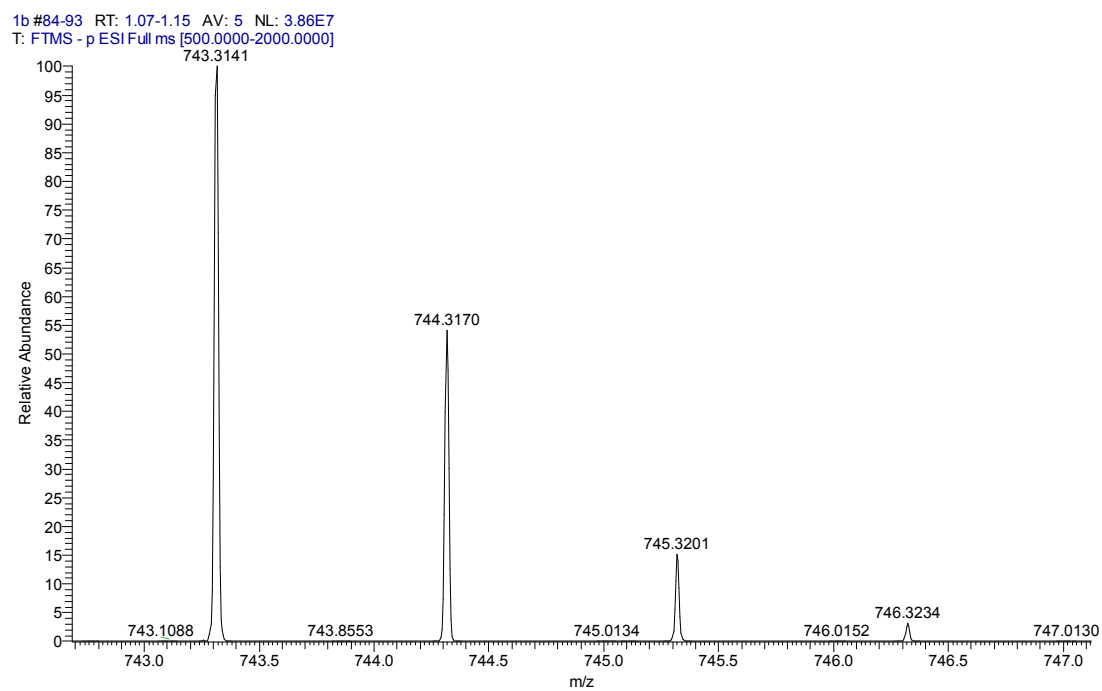

**Figure S38.** ESI mass spectrum of **1b** in DMSO in negative mode

9a #17-24 RT: 0.16-0.22 AV: 4 NL: 3.52E8  
T: FTMS + p ESI Full ms [100.0000-700.0000]

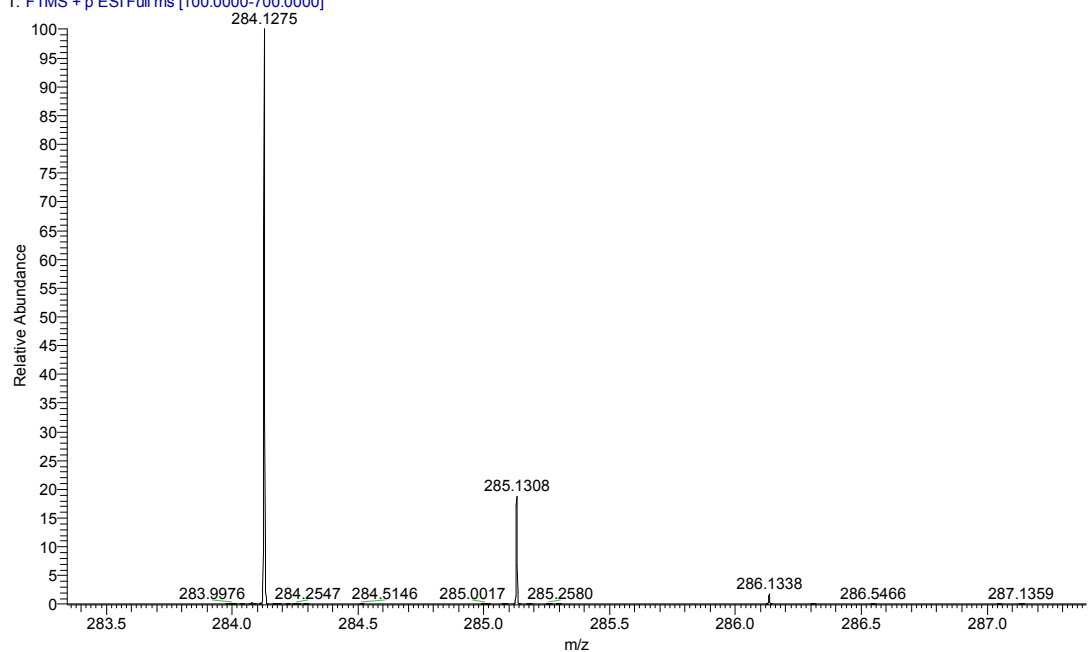

Figure S39. ESI mass spectrum of 7a in DCM in positive mode

9b #17-25 RT: 0.16-0.24 AV: 5 NL: 4.95E8  
T: FTMS + p ESI Full ms [100.0000-800.0000]

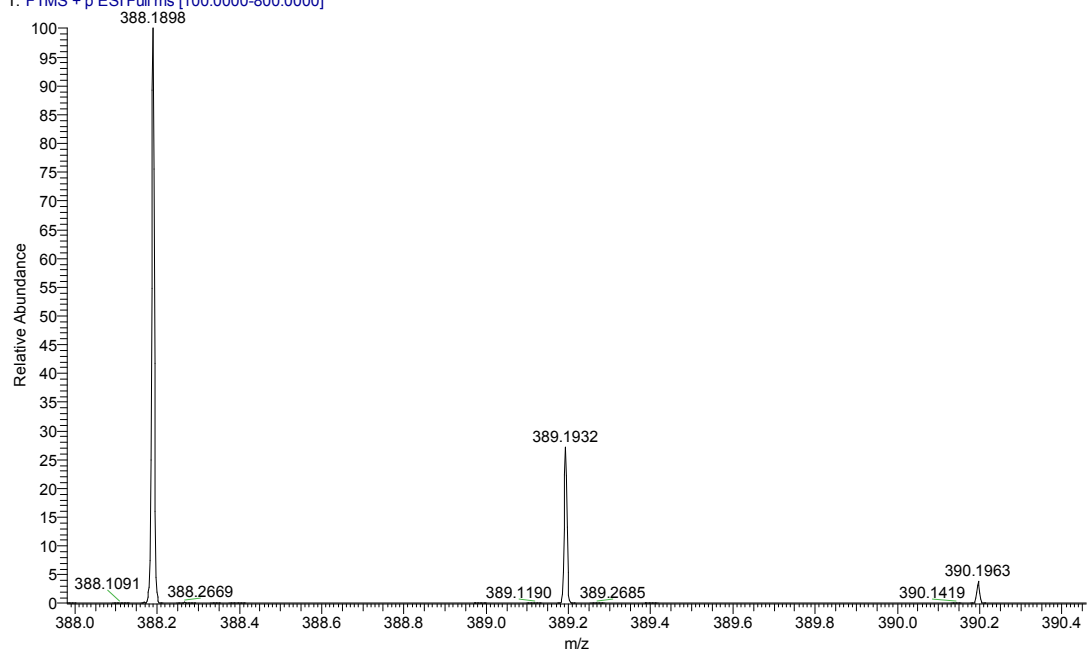

Figure S40. ESI mass spectrum of 7b in DCM in positive mode

10a #17-27 RT: 0.17-0.25 AV: 5 NL: 1.71E8  
T: FTMS -p ESI Full ms [100.0000-700.0000]

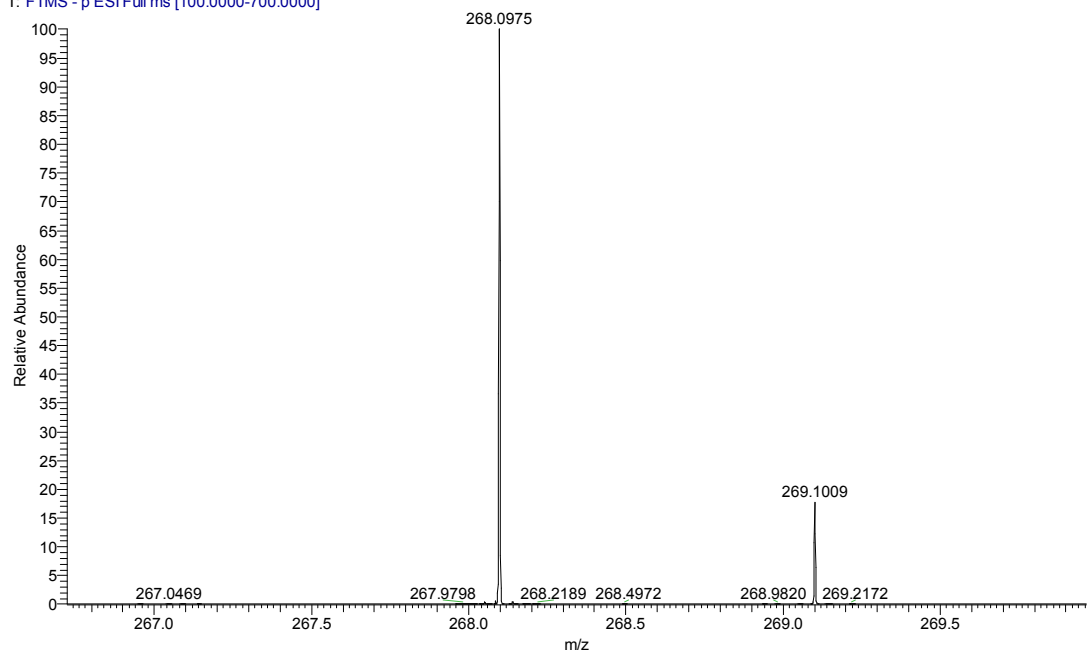

**Figure S41.** ESI mass spectrum of **8a** in DMSO in negative mode

10b #15-24 RT: 0.15-0.23 AV: 5 NL: 1.12E8  
T: FTMS -p ESI Full ms [100.0000-800.0000]

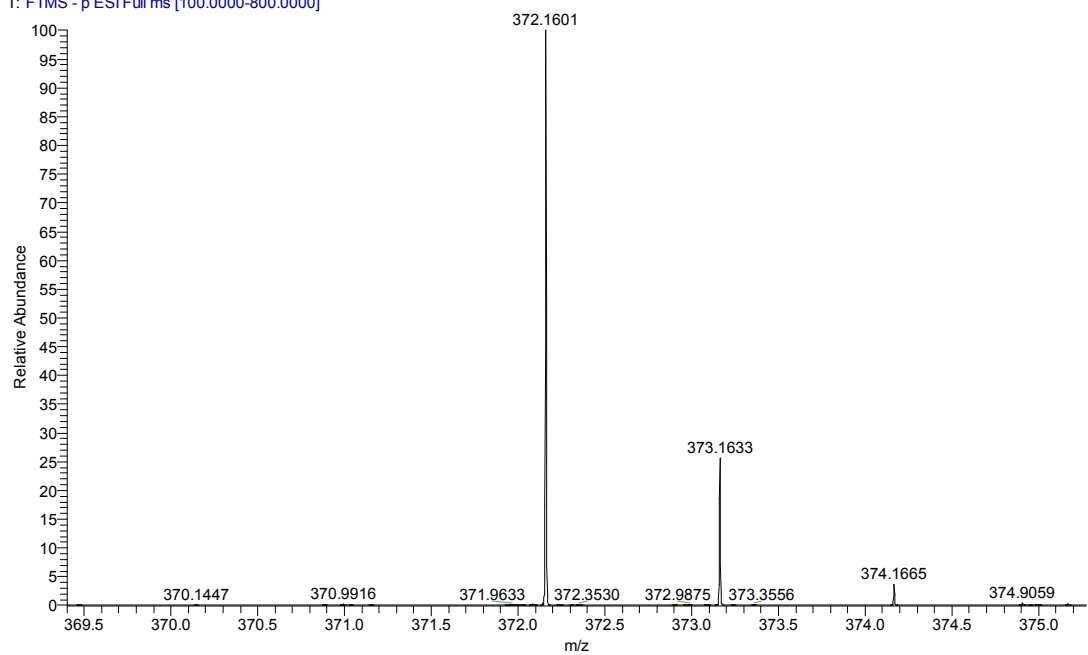

**Figure S42.** ESI mass spectrum of **8b** in DMSO in negative mode

### 3. Single-crystal X-ray diffraction analyses

#### 3.1 Methods and crystal data

Single crystals of **2** and **3** suitable for X-ray diffraction analyses were obtained by evaporation of their water and dimethyl sulfoxide solutions, respectively, while those of **4b**, **6a**, **6b** and **1a** were obtained by dissolving each of them in a solvent mixture (dichloromethane/ethanol = 90:10), followed by slow evaporation of the solvents within several days. However, single crystals of **2**, **3a**, **3b**, **4a**, **5a**, **5b** and **1b** obtained were too small to for the measurements in spite of several attempts by changing the solvents and methods.

Crystal data for **4b**, **6a**, **6b** and **1a** were collected using a Rigaku-AFC7 equipped with a Rigaku Saturn CCD area-detector system. The measurement was made by using graphic monochromatic Mo K $\alpha$  radiation ( $\lambda$  = 0.71073 Å) under a cold nitrogen stream. The frame data were integrated and absorption correction using a Rigaku Crystal Clear program package. All calculations were performed with the *SHELXTL-97* program package, [S1-S3] and structures were solved by direct methods and refined by full-matrix least-squares against  $F^2$ . All non-hydrogen atoms were refined anisotropically, and hydrogen atoms of the organic ligands were generated theoretically onto the specific atoms. Crystallographic data are summarized as followings and have been deposited in the Cambridge Crystallographic Data Center as supplementary publication number CCDC 1856478, 1854207, 1854208, 1894292 for **4b**, **6a**, **6b** and **1a**, respectively, which can be obtained free of charge from the Cambridge Crystallographic Data Center via [www.ccdc.cam.ac.uk/data\\_request/cif](http://www.ccdc.cam.ac.uk/data_request/cif).

*Crystal data for 4b:* empirical formula  $C_{25}H_{24}NO_3Br$ , formula weight 465.09,  $T = 293(2)$  K, wavelength 0.71073 Å, crystal system: monoclinic, space group  $P2_1/n$ , unit cell dimensions  $a = 12.2045(9)$  Å,  $b = 12.4239(7)$  Å,  $c = 14.9788(12)$  Å,  $\alpha = 90^\circ$ ,  $\beta = 100.238^\circ(8)$ ,  $\gamma = 90^\circ$ ,  $V = 2235.0(3)$  Å<sup>3</sup>,  $Z = 10$ ,  $\rho_{cal} = 1.279$  g / cm<sup>3</sup>, absorption coefficient, 0.083 mm<sup>-1</sup>,  $F(000) = 910.0$ , crystal size  $0.55 \times 0.45 \times 0.40$  mm<sup>3</sup>, theta range for data collection  $7.119^\circ$  to  $58.604^\circ$ , index ranges  $-16 \leq h \leq 15$ ;  $-16 \leq k \leq 15$ ;  $-19 \leq l \leq 20$ , reflections collected 19756, independent reflections, 5148 [ $R$  (int) = 0.0656,  $R(\sigma) = 0.1003$ ],  $GooF(F^2) = 1.024$ ,  $R_1 = 0.0664$ ,  $wR_2 = 0.1261$  for  $I \geq 2\sigma(I)$ ,  $R_1 = 0.1598$ ,  $wR_2 = 0.1497$  for all data, data completeness 0.842 and largest diff. peak and hole, 0.85 and -0.70 e. Å<sup>-3</sup>.

*Crystal data for 6a:* empirical formula  $C_{34}H_{32}N_2O_6$ , formula weight 564.23,  $T = 293(2)$  K, wavelength 0.71073 Å, crystal system: triclinic, space group  $P-1$ , unit cell dimensions  $a = 10.4723(7)$  Å,  $b = 12.7127(9)$  Å,  $c = 12.7391(9)$  Å,  $\alpha = 113.157^\circ(7)$ ,  $\beta = 97.019^\circ(6)$ ,  $\gamma = 110.996^\circ(6)$ ,  $V = 1385.74(19)$  Å<sup>3</sup>,  $Z = 2$ ,  $\rho_{cal} = 1.343$  g / cm<sup>3</sup>, absorption coefficient, 0.093 mm<sup>-1</sup>,  $F(000) = 587.0$ , crystal size  $0.26 \times 0.16 \times 0.10$  mm<sup>3</sup>, theta range for data collection  $3.654^\circ$  to  $59.584^\circ$ , index ranges  $-13 \leq h \leq 12$ ;  $-15 \leq k \leq 16$ ;  $-15 \leq l \leq 17$ , reflections collected 20408, independent reflections, 6490 [ $R$  (int) = 0.0401,  $R(\sigma) = 0.0491$ ],  $GooF(F^2) = 1.071$ ,  $R_1 = 0.0784$ ,  $wR_2 = 0.2369$  for  $I \geq 2\sigma(I)$ ,  $R_1 = 0.1197$ ,  $wR_2 = 0.2764$  for all data, data completeness 0.817 and largest diff. peak and hole, 1.02 and -0.42 e. Å<sup>-3</sup>.

*Crystal data for 6b:* empirical formula  $C_{50}H_{48}N_2O_6$ , formula weight 772.35,  $T = 293(2)$  K, wavelength 0.71073 Å, crystal system: triclinic, space group  $P-1$ , unit cell dimensions  $a = 12.2870(13)$  Å,  $b = 13.2979(16)$  Å,  $c = 27.850(4)$  Å,  $\alpha = 86.660^\circ(13)$ ,  $\beta = 90^\circ$ ,  $\gamma = 10^\circ$ ,  $V = 4542.7(10)$  Å<sup>3</sup>,  $Z = 2$ ,  $\rho_{cal} = 1.177$  g / cm<sup>3</sup>, absorption coefficient, 0.078 mm<sup>-1</sup>,  $F(000) = 1712.0$ , crystal size  $0.30 \times 0.25 \times 0.14$  mm<sup>3</sup>, theta range for data collection  $7.056^\circ$  to  $46.512^\circ$ , index ranges  $-13 \leq h \leq 12$ ;  $-14 \leq k \leq 14$ ;  $-30 \leq l \leq 24$ , reflections collected 25172, independent reflections, 12376 [ $R$  (int) = 0.1058,  $R(\sigma) = 0.2130$ ],  $GooF(F^2) = 1.008$ ,  $R_1 = 0.1070$ ,  $wR_2 = 0.2667$  for  $I \geq 2\sigma(I)$ ,  $R_1 = 0.2354$ ,  $wR_2 = 0.3490$  for all data, data completeness 0.949 and largest diff. peak and hole, 0.47 and -0.26 e. Å<sup>-3</sup>.

*Crystal data for 1a*: empirical formula C<sub>32</sub>H<sub>28</sub>N<sub>2</sub>O<sub>6</sub>, formula weight 536.23, T = 293(2) K, wavelength 1.54184 Å, crystal system: orthorhombic, space group Pna21, unit cell dimensions a = 32.9749(8) Å, b = 12.7486(2) Å, c = 24.5123(6) Å,  $\alpha = 90^\circ$ ,  $\beta = 90^\circ$ ,  $\gamma = 90^\circ$ , V = 10298.3(4) Å<sup>3</sup>, Z = 4,  $\rho_{\text{cal}} = 1.361 \text{ g / cm}^3$ , absorption coefficient, 0.779 mm<sup>-1</sup>, F(000) = 4418.0, crystal size 0.2 × 0.12 × 0.08 mm<sup>3</sup>, theta range for data collection 3.2120° to 73.9060°, index ranges -41 ≤ h ≤ 41; -15 ≤ k ≤ 16; -25 ≤ l ≤ 31, reflections collected 20878, independent reflections, 11364 R (int) = 0.894, R(sigma) = 0.940], GooF(F<sup>2</sup>) = 1.351, R<sub>1</sub> = 0.1779, wR<sub>2</sub> = 0.3425 for I ≥ 2sigma (I), R<sub>1</sub> = 0.1534, wR<sub>2</sub> = 0.3669 for all data, data completeness 0.940 and largest diff. peak and hole, 1.083 and -0.468 e. Å<sup>-3</sup>.

### 3.2 The molecular structure of 4b

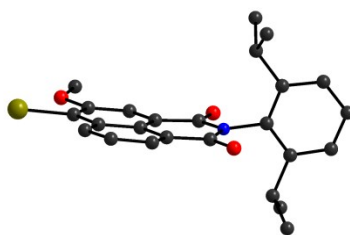

**Figure S43.** Molecular structure of **4b** in the single crystal as determined by single crystal X-ray analysis at 293 K. Hydrogen atoms are omitted for clarity



#### 4. Chiral HPLC analyses of 6a, 6b, 1a, 1b, (R)-1a

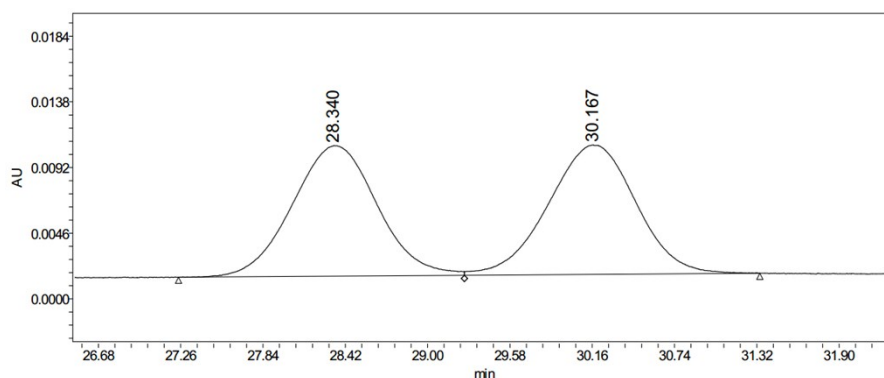

**Figure S44.** HPLC chromatogram of **6a** on a CHIRALPAK chiral- NR column (  $\Phi = 0.46$  cm) at ambient conditions using a mixture solution of cyclohexane and isopropanol (1:1 in volume) as eluent (flow rate 0.5 mL/min).

**Table S1.** The chiral HPLC chromatographic data of **6a** on a CHIRALPAK chiral-NR column (  $\Phi = 0.46$  cm) at ambient conditions

| Peak | Processed channel | Ret. Time (min) | Area (mAu*s) | Height (mAu) | Area (%) |
|------|-------------------|-----------------|--------------|--------------|----------|
| 1    | PDA 400.02 nm     | 28.340          | 380585       | 9141         | 49.39    |
| 2    | PDA 400.02 nm     | 30.167          | 389922       | 9065         | 50.61    |

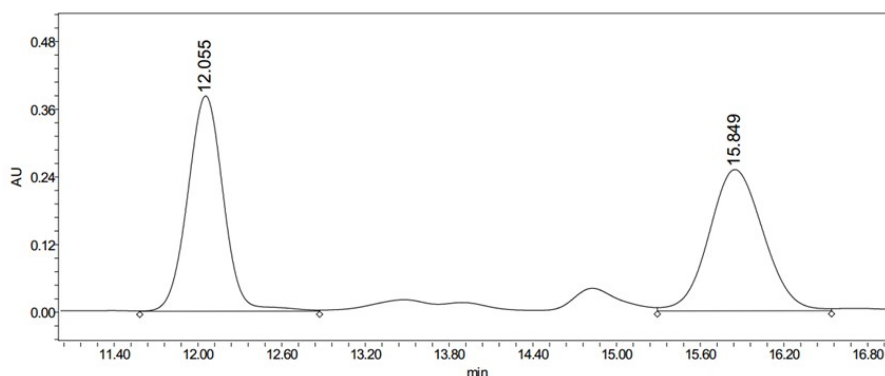

**Figure S45.** HPLC chromatogram of **6b** on a CHIRALPAK chiral-NR column (  $\Phi = 0.46$  cm) at ambient conditions using a mixture solution of cyclohexane and isopropanol (1:1 in volume) as eluent (flow rate 0.5 mL/min).

**Table S2.** The chiral HPLC chromatographic data of **6b** on a CHIRALPAK chiral-NR column (  $\Phi = 0.46$  cm) at ambient conditions

| Peak | Processed channel | Ret. Time (min) | Area (mAu*s) | Height (mAu) | Area (%) |
|------|-------------------|-----------------|--------------|--------------|----------|
| 1    | PDA 400.02 nm     | 12.055          | 6793359      | 381593       | 50.02    |
| 2    | PDA 400.02 nm     | 15.849          | 6786911      | 250502       | 49.98    |

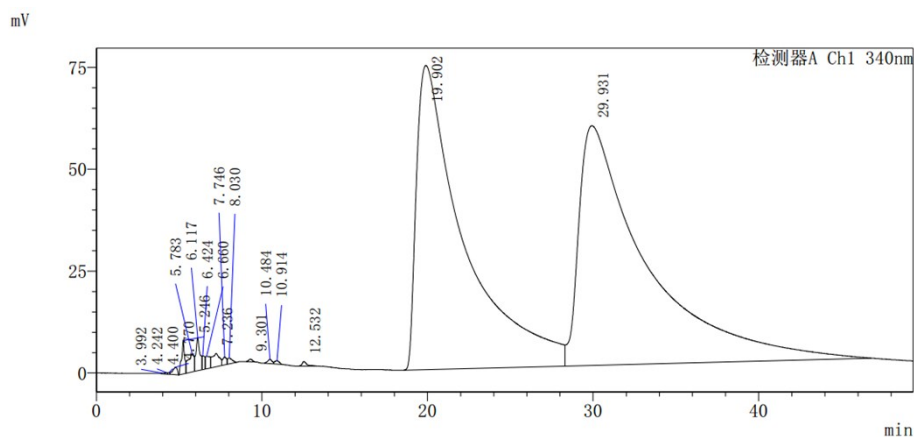

**Figure S46.** HPLC chromatogram of **1a** on a SHIMADZU-GL INERTSIL chiral- preparation column (  $\Phi = 0.50$  cm) at ambient conditions using a mixture solution of cyclohexane and ethyl acetate (2:3 in volume) as eluent (flow rate 0.7 mL/min).

**Table S3.** The chiral HPLC chromatographic data of **1a** on a SHIMADZU-GL INERTSIL chiral- preparation column (  $\Phi = 0.50$  cm) at ambient conditions

| Peak | Processed channel | Ret. Time (min) | Area (mAu*s) | Height (mAu) | Area (%) |
|------|-------------------|-----------------|--------------|--------------|----------|
| 1    | Ch1 340nm         | 19.902          | 14794683     | 74646        | 46.93    |
| 2    | Ch1 340nm         | 29.931          | 16732072     | 58839        | 53.07    |

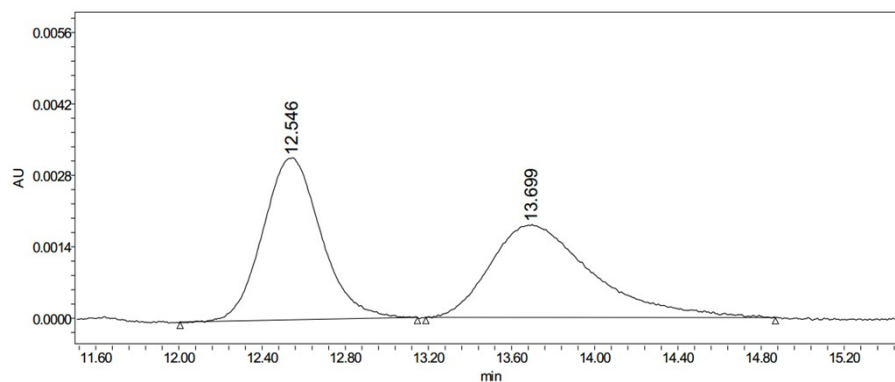

**Figure S47.** HPLC chromatogram of **1b** on a CHIRALPAK chiral-NR column (  $\Phi = 0.46$  cm) at ambient conditions using a mixture solution of cyclohexane and isopropanol (4:1 in volume) as eluent (flow rate 0.5 mL/min).

**Table S4.** The chiral HPLC chromatographic data of **1b** on a CHIRALPAK chiral-NR column (  $\Phi = 0.46$  cm) at ambient conditions

| Peak | Processed channel | Ret. Time (min) | Area (mAu*s) | Height (mAu) | Area (%) |
|------|-------------------|-----------------|--------------|--------------|----------|
| 1    | PDA 400.02 nm     | 12.546          | 61940        | 3176         | 50.03    |
| 2    | PDA 400.02 nm     | 13.699          | 61866        | 1814         | 49.97    |

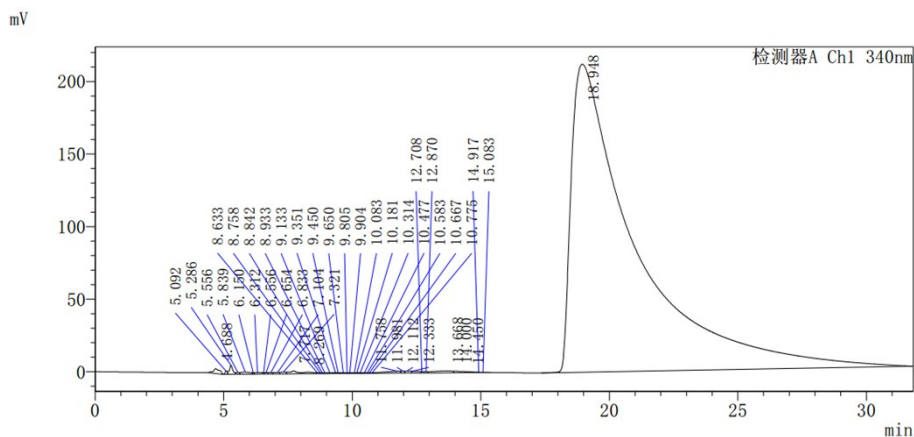

**Figure S48.** HPLC chromatogram of **1a-1** on a SHIMADZU-GL INERTSIL chiral- preparation column ( $\Phi = 0.50$  cm) at ambient conditions using a mixture solution of cyclohexane and ethyl acetate (2:3 in volume) as eluent (flow rate 0.7 mL/min).

**Table S5.** The chiral HPLC chromatographic data of **1a-1** on a SHIMADZU-GL INERTSIL chiral- preparation column ( $\Phi = 0.50$  cm) at ambient conditions

| Peak | Processed channel | Ret. Time (min) | Area (mAu*s) | Height (mAu) | Area (%) |
|------|-------------------|-----------------|--------------|--------------|----------|
| 1    | Ch1 340nm         | 18.948          | 36925211     | 212348       | 98.29    |
| 2    | Ch1 340nm         | 29.931          | 642434       | 4394         | 1.71     |

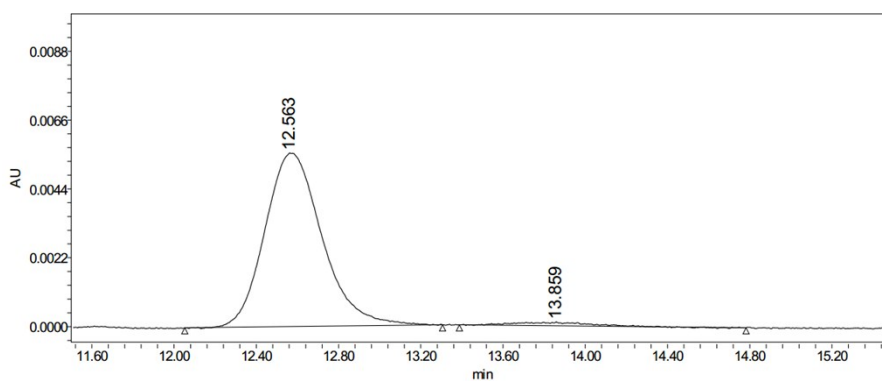

**Figure S49.** HPLC chromatogram of **1b-1** on a CHIRALPAK chiral-NR column ( $\Phi = 0.46$  cm) at ambient conditions using a mixture solution of cyclohexane and isopropanol (4:1 in volume) as eluent (flow rate 0.5 mL/min).

**Table S6.** The chiral HPLC chromatographic data of **1b-1** on a CHIRALPAK chiral-NR column ( $\Phi = 0.46$  cm) at ambient conditions

| Peak | Processed channel | Ret. Time (min) | Area (mAu*s) | Height (mAu) | Area (%) |
|------|-------------------|-----------------|--------------|--------------|----------|
| 1    | PDA 400.02 nm     | 12.563          | 107127       | 5545         | 97.24    |
| 2    | PDA 400.02 nm     | 13.859          | 3044         | 121          | 2.76     |

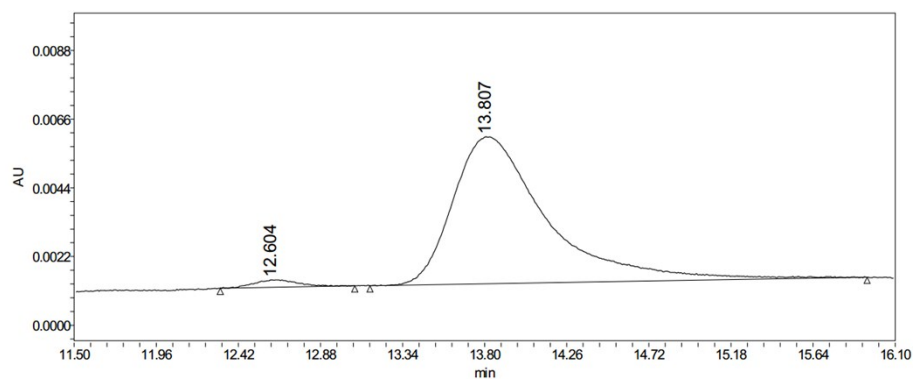

**Figure S50.** HPLC chromatogram of **1b-2** on a CHIRALPAK chiral-NR column ( $\Phi = 0.46$  cm) at ambient conditions using a mixture solution of cyclohexane and isopropanol (4:1 in volume) as eluent (flow rate 0.5 mL/min).

**Table S7.** The chiral HPLC chromatographic data of **1b-2** on a CHIRALPAK chiral-NR column ( $\Phi = 0.46$  cm) at ambient conditions

| Peak | Processed channel | Ret. Time (min) | Area (mAu*s) | Height (mAu) | Area (%) |
|------|-------------------|-----------------|--------------|--------------|----------|
| 1    | PDA 400.02 nm     | 12.604          | 4033         | 237          | 2.29     |
| 2    | PDA 400.02 nm     | 13.807          | 172049       | 4706         | 97.71    |

## 5. Absorption absorption, fluorescence and circular dichroism spectral measurements

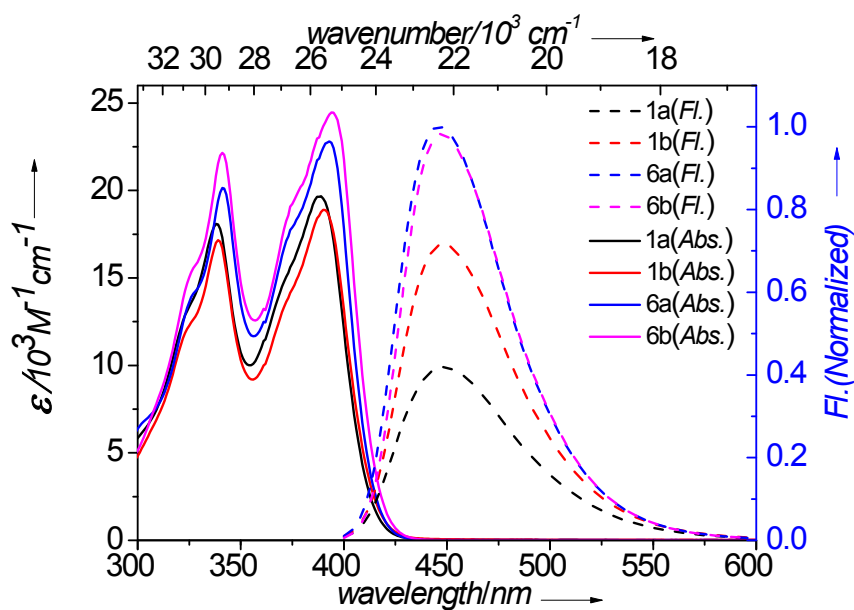

**Figure S51.** Absorption absorption (solid lines) and fluorescence spectra (dashed lines) of **1a-1b** and their methylated **6a-6b**; All spectra were measured for dilute solutions ( $10^{-5} \text{ M}$ ) in ethyl acetate at 298 K, and the fluorescence intensities have been normalized with the strongest emission intensity of **6a**.

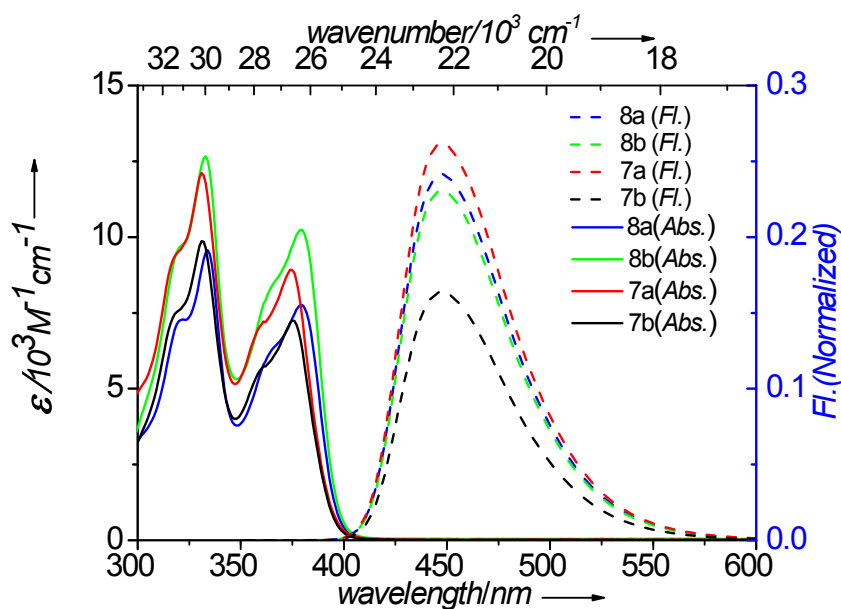

**Figure S52.** Absorption absorption (solid lines) and fluorescence spectra (dashed lines) of **7a-7b** and their methylated **8a-8b**; All spectra were measured for dilute solutions ( $10^{-5} \text{ M}$ ) in ethyl acetate at 298 K, and the fluorescence intensities have been normalized with the strongest emission intensity of **7a**.

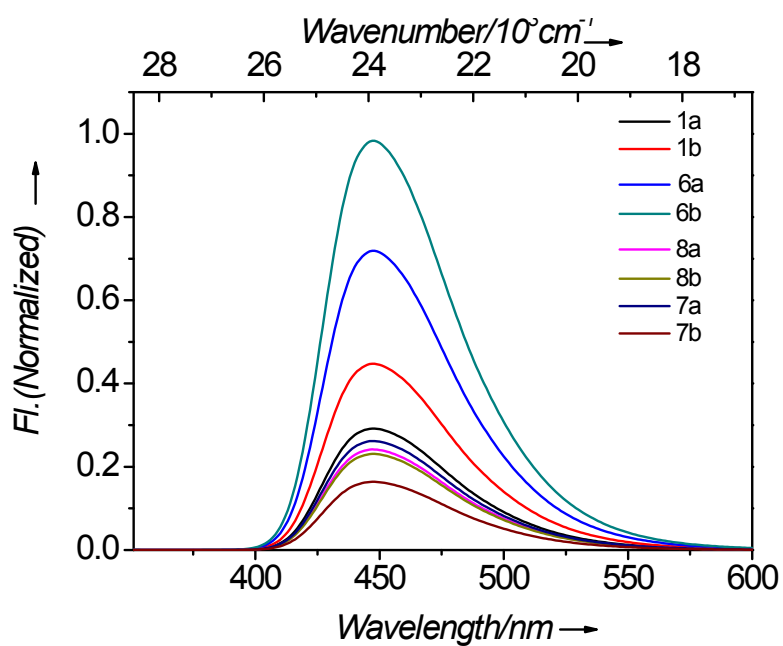

**Figure S53.** The fluorescence spectral of **1a-1b**, **6a-6b**, **8a-8b** and **7a-7b** in EA solutions

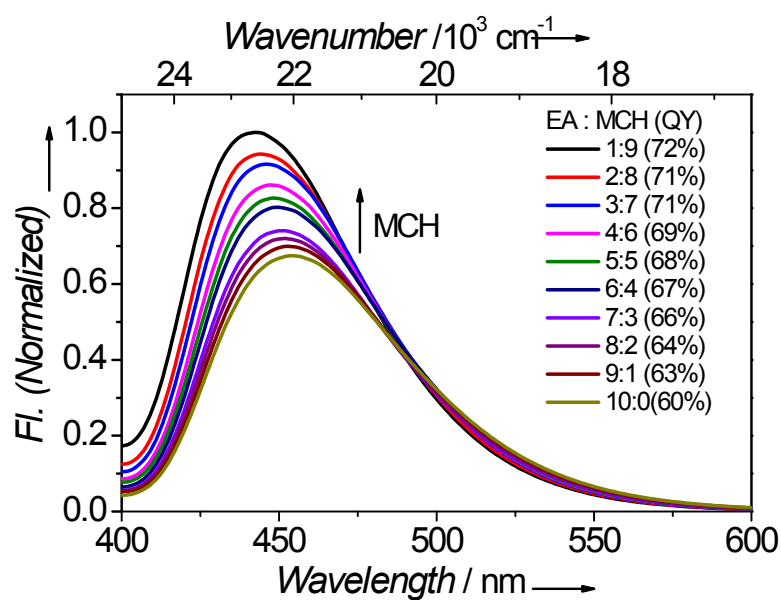

**Figure S54.** The fluorescence spectral changes of **6a** in EA solutions with the increasing of MCH fractions; for clarity, the fluorescence intensities have been normalized with the strongest emissions in EA-MCH mixture with a ratio of 1: 9.

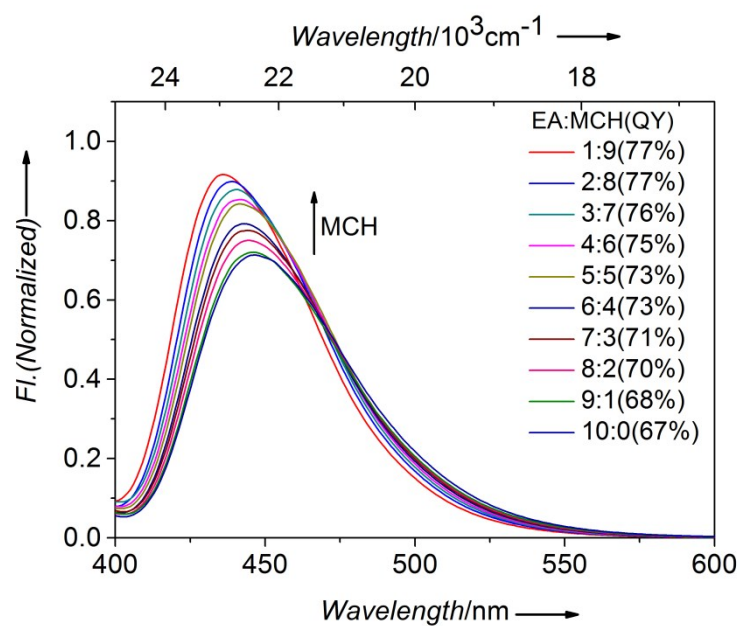

**Figure S55.** The fluorescence spectral changes of **6b** in EA solutions with the increasing of MCH fractions; for clarity, the fluorescence intensities have been normalized with the strongest emissions in EA-MCH mixture with a ratio of 1: 9.

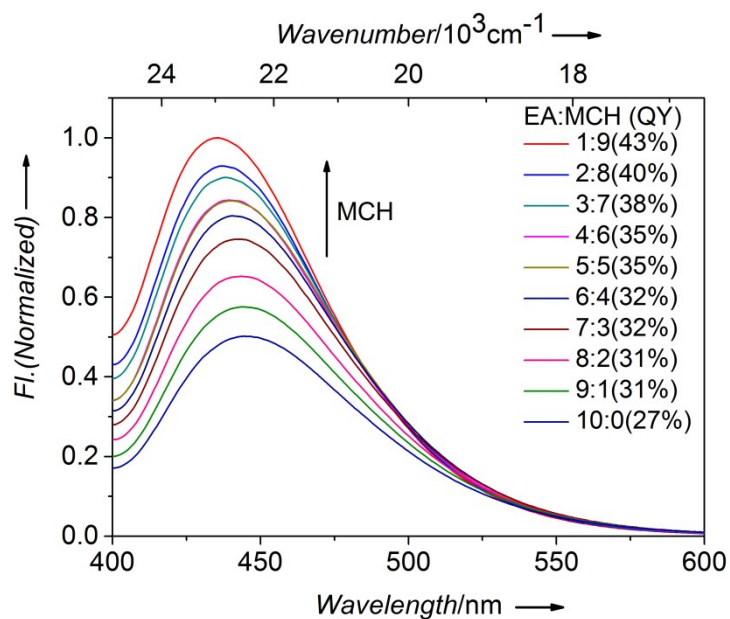

**Figure S56.** The fluorescence spectral changes of **1a** in EA solutions with the increasing of MCH fractions; for clarity, the fluorescence intensities have been normalized with the strongest emissions in EA-MCH mixture with a ratio of 1: 9.

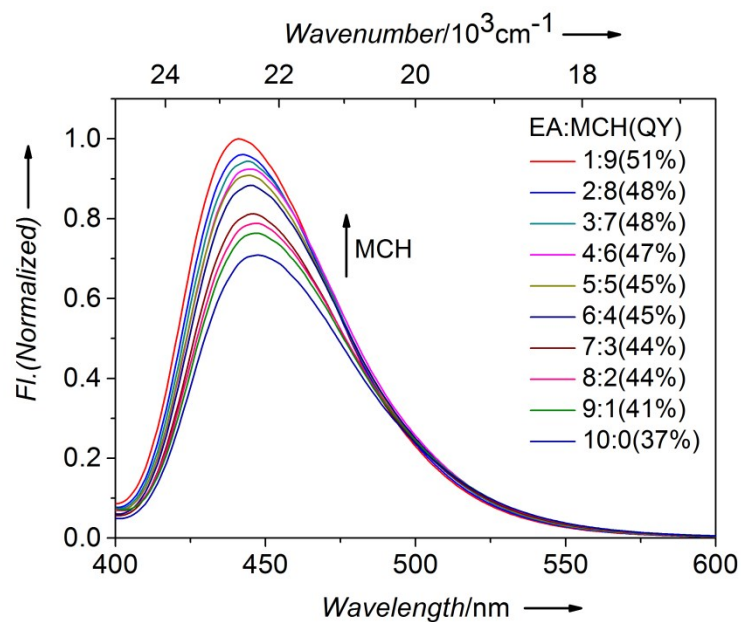

**Figure S57.** The fluorescence spectral changes of **1b** in EA solutions with the increasing of MCH fractions; for clarity, the fluorescence intensities have been normalized with the strongest emissions in EA-MCH mixture with a ratio of 1: 9.

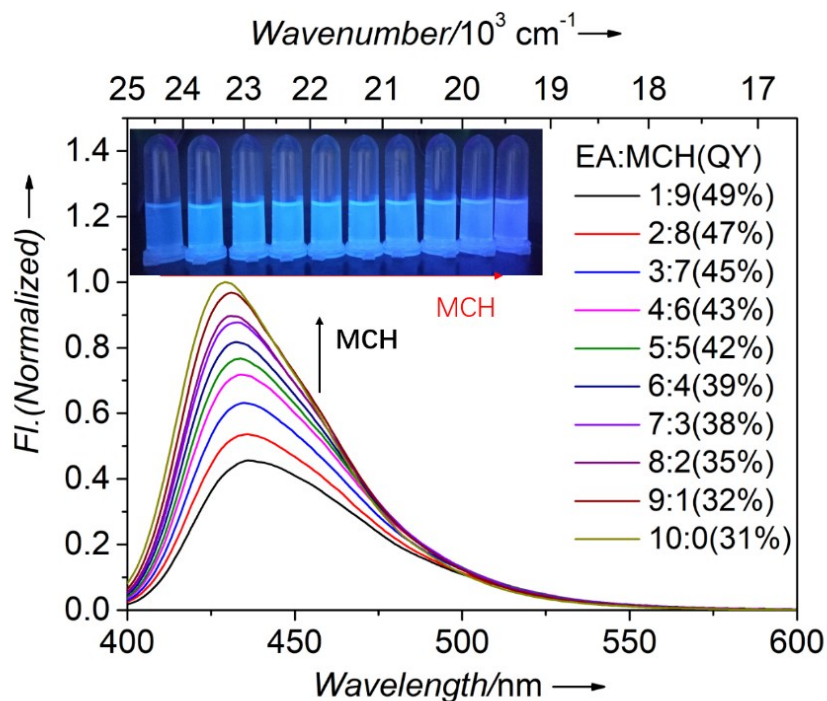

**Figure S58.** The fluorescence spectral changes of **R-1a** in EA solutions with the increasing of MCH fractions; for clarity, the fluorescence intensities have been normalized with the strongest emissions in EA-MCH mixture with a ratio of 1: 9.



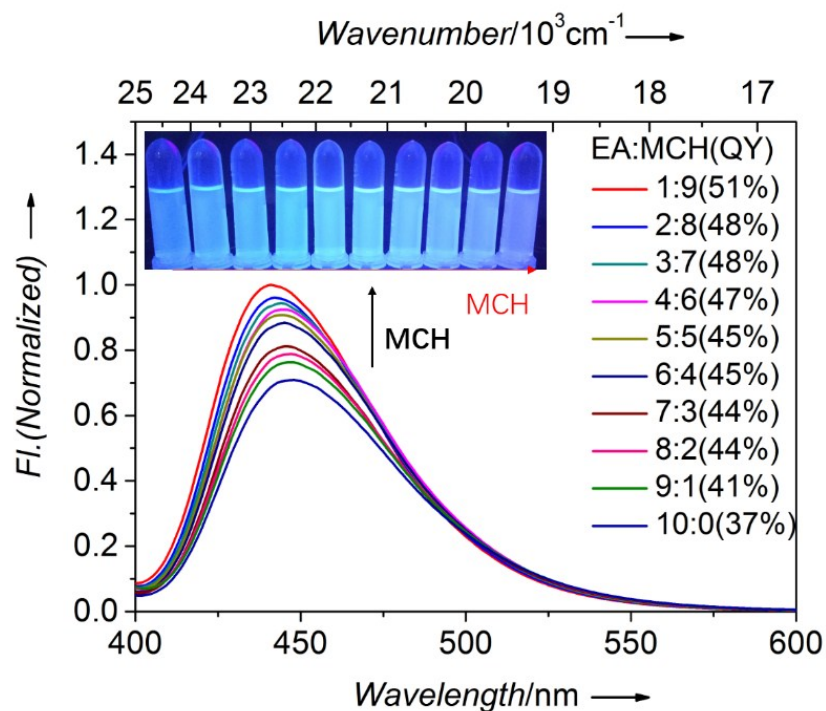

**Figure S59.** The fluorescence spectral changes of **1b** in EA solutions with the increasing of MCH fractions; for clarity, the fluorescence intensities have been normalized with the strongest emissions in EA-MCH mixture with a ratio of 1: 9

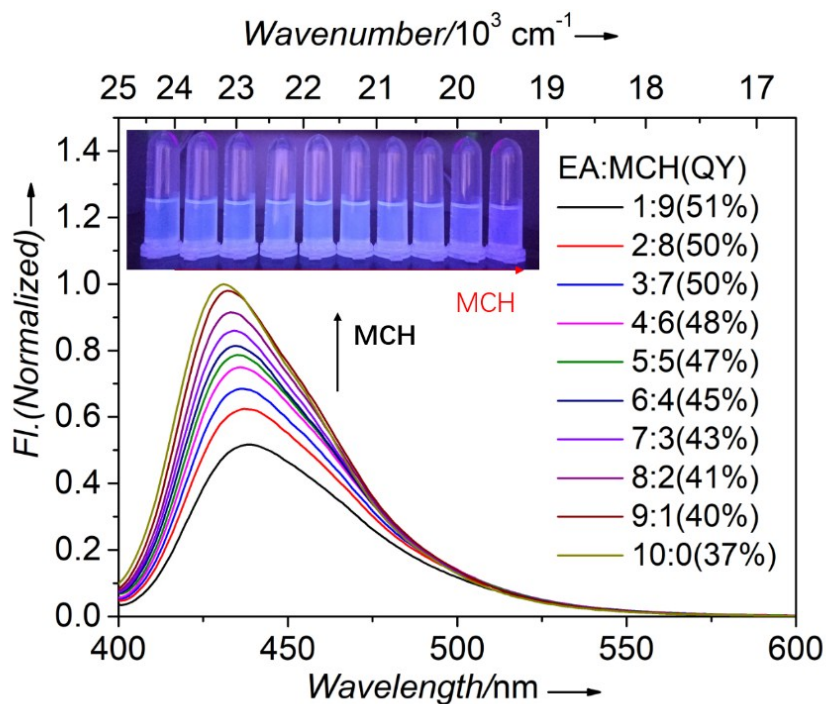

**Figure S60.** The fluorescence spectral changes of **R-1b** in EA solutions with the increasing of MCH fractions; for clarity, the fluorescence intensities have been normalized with the strongest emissions in EA-MCH mixture with a ratio of 1: 9.

## 6. Cyclic voltammetry measurements

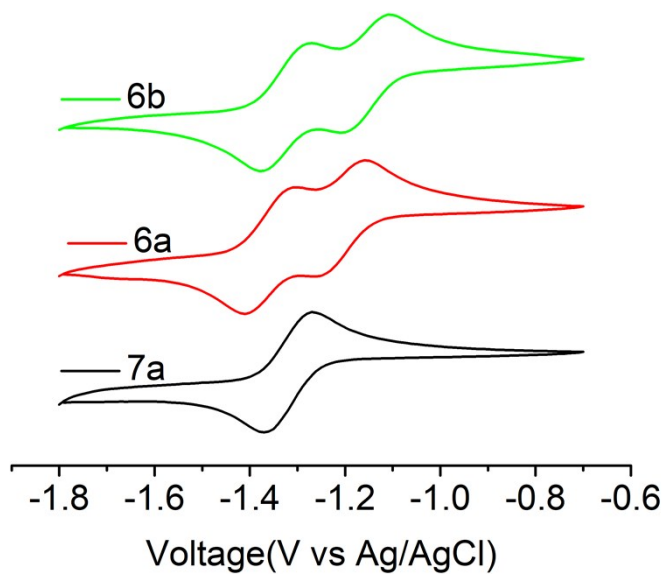

**Figure S61.** Cyclic voltammetry of **6a**, **6b**, **7a** recorded with a scan rate of  $100 \text{ mV} \cdot \text{s}^{-1}$  at 298K in Ar-purged solvent mixture (ethyl acetate: acetonitrile=5:1) (1mM) using a glassy carbon working electrode and 0.1M  $[\text{Bu}_4\text{N}]^+[\text{PF}_6]^-$  as the supporting electrolyte.

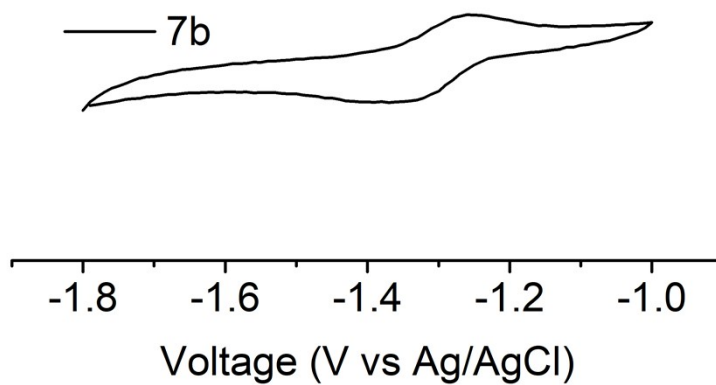

**Figure S62.** Cyclic voltammetry of **7b** recorded with a scan rate of  $100 \text{ mV} \cdot \text{s}^{-1}$  at 298K in Ar-purged solvent mixture (ethyl acetate: acetonitrile=5:1) (1mM) using a glassy carbon working electrode and 0.1M  $[\text{Bu}_4\text{N}]^+[\text{PF}_6]^-$  as the supporting electrolyte.

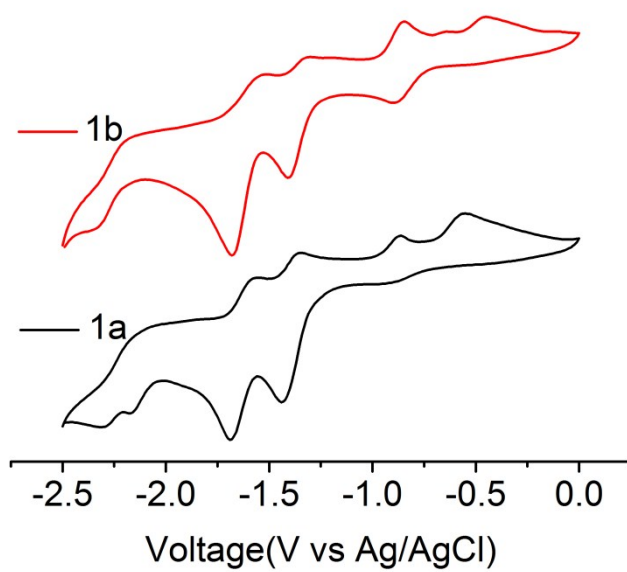

**Figure S63.** Cyclic voltammetry of **1a** and **1b** recorded with a scan rate of 100  $\text{mV} \cdot \text{s}^{-1}$  at 298K in Ar-purged solvent mixture (ethyl acetate: acetonitrile=5:1) (1mM) using a glassy carbon working electrode and 0.1M  $[\text{Bu}_4\text{N}]^+[\text{PF}_6]^-$  as the supporting electrolyte.

## 7. Theoretical calculations

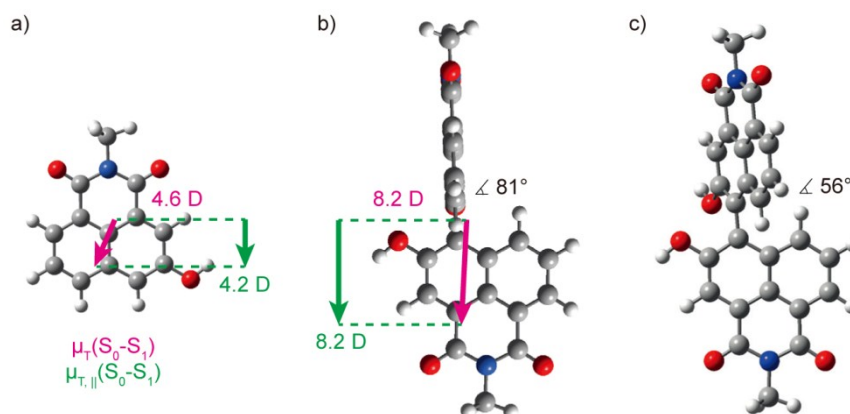

**Figure S64.** a) Optimized structure of the compound **8** model in the electronic ground state. b) Optimized structure of the compound **1** model in the electronic ground state. c) Optimized structure of the compound **1** model in the electronically excited S1 state. In a) and b), the S0-S1 transition dipole moments (pink) are plotted as well as their projection on the C-C connection axis of the NI units (green)

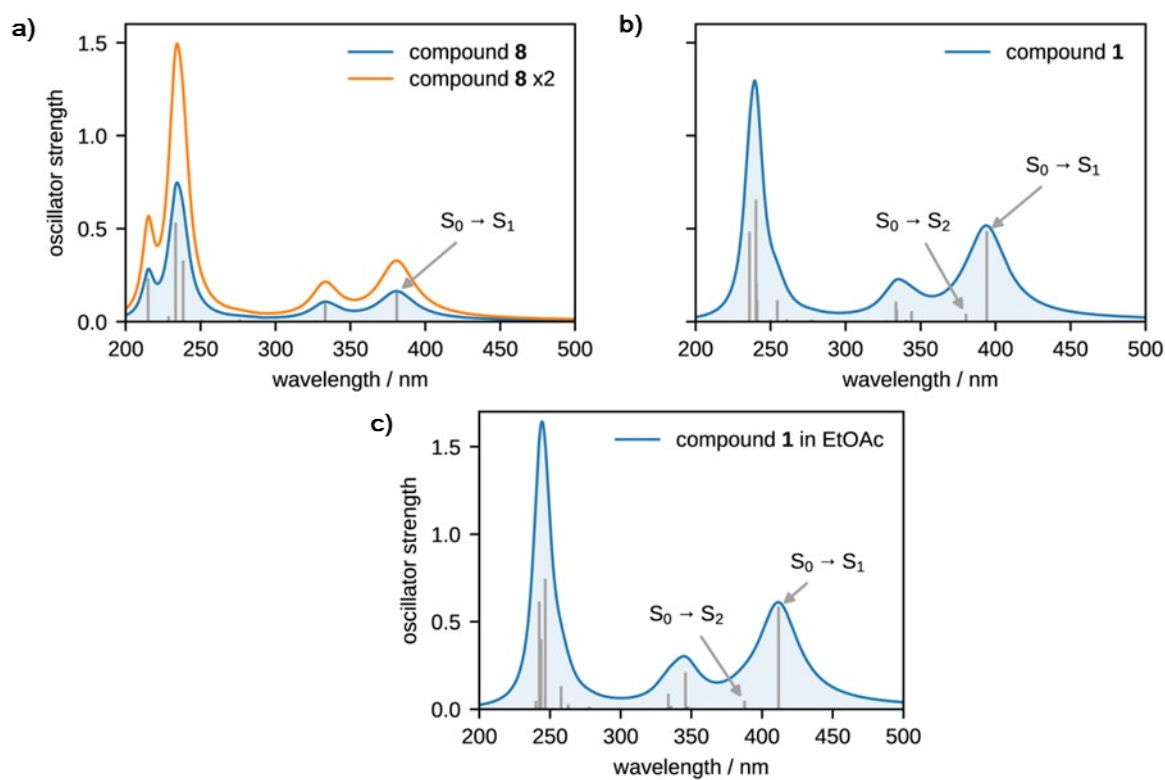

**Figure S65.** Calculated absorption spectra for a) compound **8** and b) compound **1** in vacuum, as well as c) for compound **1** with an implicit solvation model of ethyl acetate. For better comparability, the spectrum of **8** is also depicted multiplied by a factor of 2.

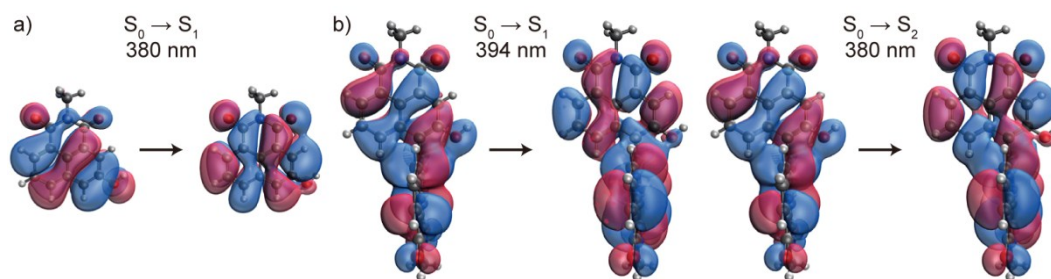

**Figure S66.** Natural transition orbitals for the lowest electronic transitions in a) compound **8** and b) compound **1** models.

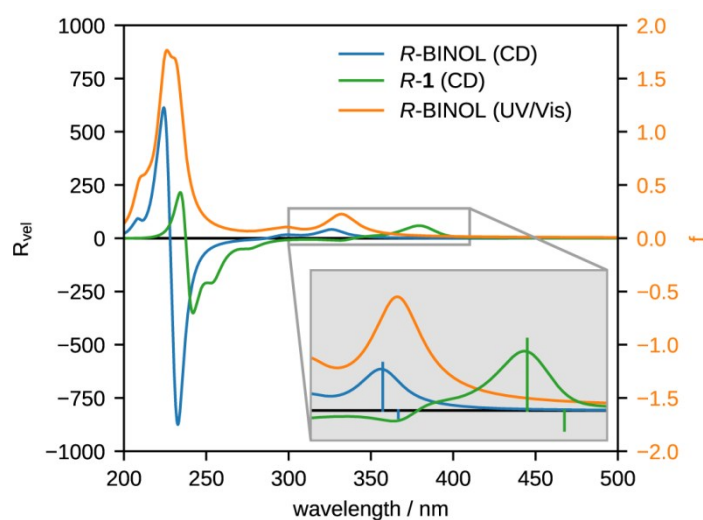

**Figure S67.** Calculated CD spectra of **R-1** and **R-BINOL** and absorption spectrum of **R-BINOL**. In the zoomed inset, the rotatory strengths for the lowest two vertical transitions are visualized. The spectra have been calculated and convoluted according to the methods section in the main paper.

## 8. Methanol-water system luminescence measurements

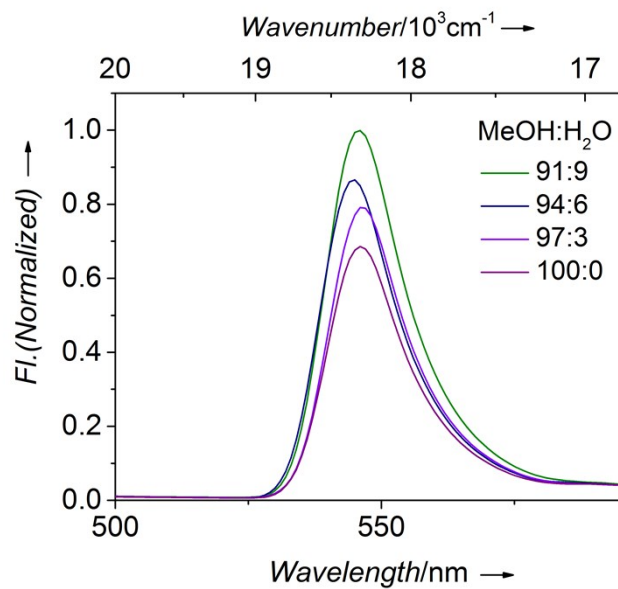

**Figure S68.** The fluorescence spectral changes of **1a** in CH<sub>3</sub>OH solutions with the increasing of H<sub>2</sub>O fractions; for clarity, the fluorescence intensities have been normalized in CH<sub>3</sub>OH - H<sub>2</sub>O mixture with a ratio of 91: 9.

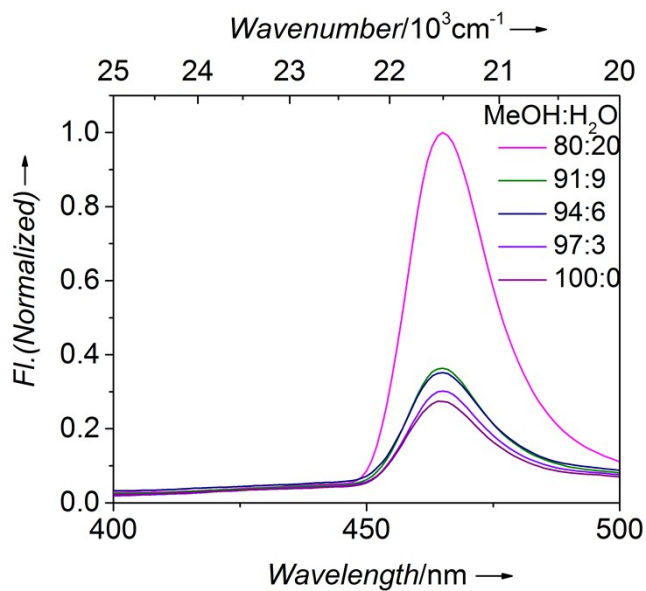

**Figure S69.** The fluorescence spectral changes of **6a** in CH<sub>3</sub>OH solutions with the increasing of H<sub>2</sub>O fractions; for clarity, the fluorescence intensities have been normalized in CH<sub>3</sub>OH - H<sub>2</sub>O mixture with a ratio of 4 : 1.

## 9. Luminescence lifetime measurements

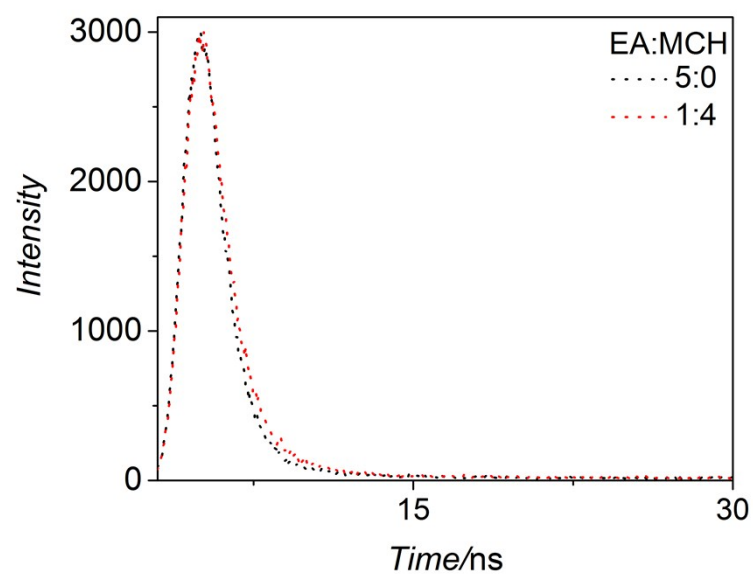

**Figure S70.** The luminescence lifetime spectra of **1a** at  $3 \times 10^{-3}$  M in the solvent of EA (black dash line) and the mixture of EA-MCH (1:4).

The sample in EA (black dash line) with the lifetime fitting formula:

$$R(t) = 2119.44e^{-t/1.04} + 66.85e^{-t/5.94}$$

$$\chi^2 = 1.173$$

$$t_{(5:0)} = 1.79 \text{ ns}$$

The sample in the mixture of 80 % MCH (red dash line) with the lifetime fitting formula:

$$R(t) = 2250.90e^{-t/1.22} + 54.76e^{-t/7.69}$$

$$\chi^2 = 1.200$$

$$t_{(1:4)} = 2.08 \text{ ns}$$

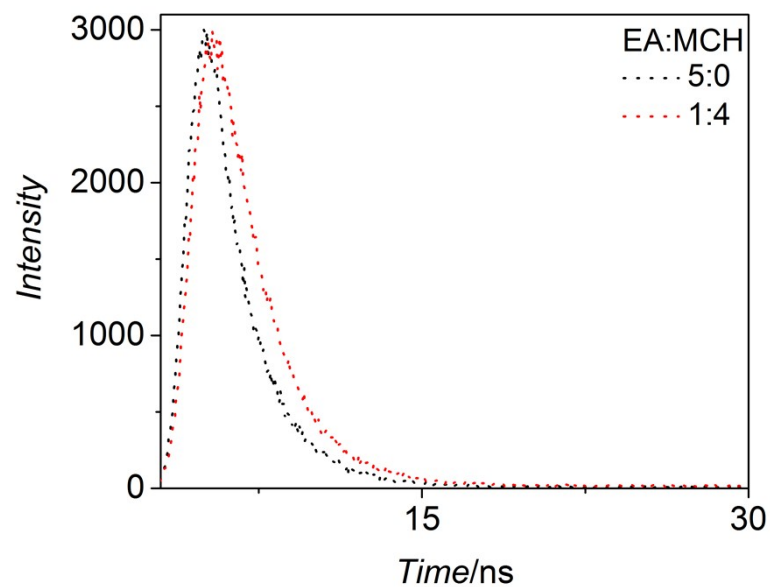

**Figure S71.** The luminescence lifetime spectra of **1b** at  $3 \times 10^{-3}$  M in the solvent of EA (black dash line) and the mixture of EA-MCH (1:4).

The sample in EA (black dash line) with the lifetime fitting formula:

$$R(t) = 3245.54e^{-t/2.01}$$

$$\chi^2 = 1.283$$

$$t_{(5:0)} = 2.01 \text{ ns}$$

The sample in the mixture of 80 % MCH (red dash line) with the lifetime fitting formula:

$$R(t) = 2528.91e^{-t/2.19}$$

$$\chi^2 = 1.194$$

$$t_{(1:4)} = 2.19 \text{ ns}$$



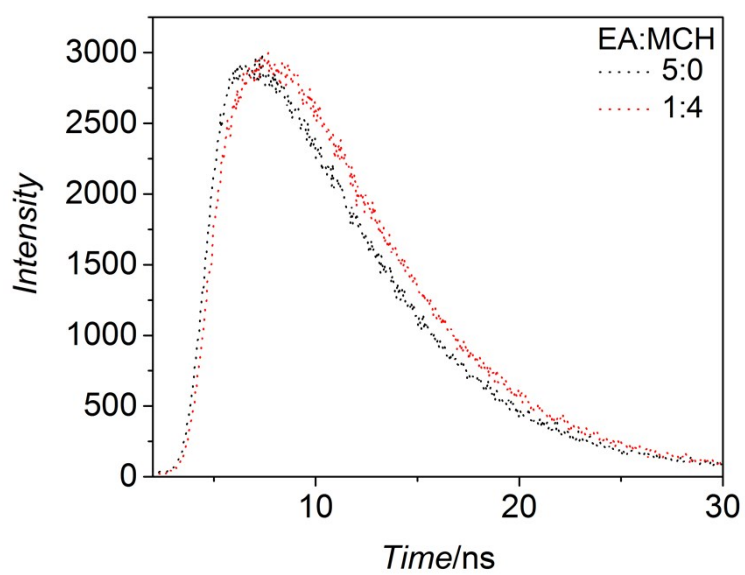

**Figure S72.** The luminescence lifetime spectra of **6a** at  $3 \times 10^{-3}$  M in the solvent of EA (black dash line) and the mixture of EA-MCH (1:4).

The sample in EA (black dash line) with the lifetime fitting formula:

$$R(t) = 2711.809e^{-t/4.2172}$$

$$\chi^2 = 1.256$$

$$\tau_{(5:0)} = 4.2172 \text{ ns}$$

The sample in the mixture of 80 % MCH (red dash line) with the lifetime fitting formula:

$$R(t) = 1153.44e^{-t/5.2874}$$

$$\chi^2 = 1.009$$

$$\tau_{(1:4)} = 5.2874 \text{ ns}$$

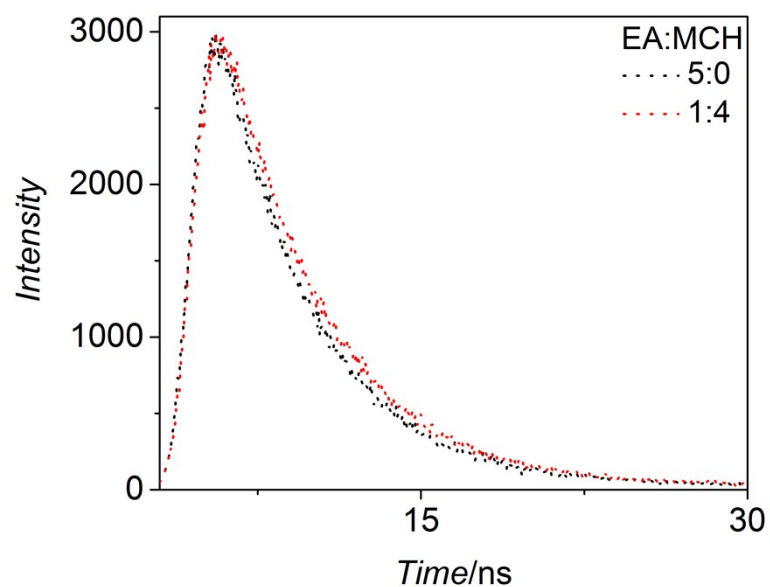

**Figure S73.** The luminescence lifetime spectra of **6b** at  $3 \times 10^{-3}$  M in the solvent of EA (black dash line) and the mixture of EA-MCH (1:4).

The sample in EA (black dash line) with the lifetime fitting formula:

$$R(t) = 2794.82e^{-t/4.32}$$

$$\chi^2 = 1.049$$

$$\tau_{(5:0)} = 4.32 \text{ ns}$$

The sample in the mixture of 80 % MCH (red dash line) with the lifetime fitting formula:

$$R(t) = 3032.21e^{-t/4.56}$$

$$\chi^2 = 1.213$$

$$\tau_{(1:4)} = 4.56 \text{ ns}$$

## 10. References

- [S1] O.V. Dolomanov, L.J. Bourhis, R.J. Gildea, J.A.K. Howard, H. Puschmann. *J. Appl. Cryst.*, **2009**, 42, 339-341.
- [S2] G. Sheldrick, *Acta Crystallogr.*, **2008**, A64, 112-122.
- [S3] A. L. Spek, *J. Appl. Cryst.*, **2003**, 36, 7-13.
